# Supplementary material
Source: PubMed Central journal article supplement (PMC4352135)
Supplement: NIHMS638364-supplement-Supplemental_Tables_and_Discussion.pdf [file NIHMS638364-supplement-Supplemental_Tables_and_Discussion.pdf]

## SUPPLEMENTARY INFORMATION

**Supplementary Table 1: Temperature-associated reduced brood size of *daf-2(e1370)* is *skn-1*-independent**

| Strain                            | Temperature | # Po | # F1 progeny [mean ± SEM] | P-value vs N2 | P-value vs <i>daf-2</i> |
|-----------------------------------|-------------|------|---------------------------|---------------|-------------------------|
| wild type (N2)                    | 15°C → 15°C | 5    | 298.8 ± 29.8              |               |                         |
| <i>skn-1(zu135)</i>               | 15°C → 15°C | 5    | 326.4 ± 32.3              | n.s.          | n.s.                    |
| <i>daf-2(e1370)</i>               | 15°C → 15°C | 5    | 333.0 ± 34.2              | n.s.          |                         |
| <i>daf-2(e1370); skn-1(zu135)</i> | 15°C → 15°C | 5    | 317.6 ± 16.3              | n.s.          | n.s.                    |
| wild type (N2)                    | 15°C → 25°C | 5    | 223.6 ± 24.1              |               |                         |
| <i>skn-1(zu135)</i>               | 15°C → 25°C | 5    | 231.0 ± 26.7              | n.s.          | P < 0.001               |
| <i>daf-2(e1370)</i>               | 15°C → 25°C | 5    | 45.2 ± 5.6                | P < 0.001     |                         |
| <i>daf-2(e1370); skn-1(zu135)</i> | 15°C → 25°C | 5    | 24.4 ± 6.5                | P < 0.001     | n.s.                    |

**Temperature-associated reduced motility phenotype of *daf-2(e1370)* is *skn-1*-independent**

| Strain                            | Temperature | motility behavior scored 2 days later |
|-----------------------------------|-------------|---------------------------------------|
| wild type (N2)                    | 15°C → 15°C | crawling (N=62)                       |
| <i>skn-1(zu135)</i>               | 15°C → 15°C | crawling (N=33)                       |
| <i>daf-2(e1370)</i>               | 15°C → 15°C | crawling (N=30)                       |
| <i>daf-2(e1370); skn-1(zu135)</i> | 15°C → 15°C | crawling (N=69)                       |
| wild type (N2)                    | 15°C → 25°C | crawling (N=60)                       |
| <i>skn-1(zu135)</i>               | 15°C → 25°C | crawling (N=31)                       |
| <i>daf-2(e1370)</i>               | 15°C → 25°C | immobile (N=64) and crawling (N=1)    |
| <i>daf-2(e1370); skn-1(zu135)</i> | 15°C → 25°C | immobile (N=74)                       |

Two dauer-related traits that are characteristic of Class 2 *daf-2* mutants are reduced brood-size and reduced mobility<sup>1</sup>. To assess brood size, animals were maintained and allowed to develop at 15°C. L4 animals were either kept at 15°C, or shifted to 25°C. Each worm was transferred daily onto a fresh NGM OP50 plate and the number of progeny was scored. *P* values were determined with one-way ANOVA post hoc Tukey. n.s. = not significant. For motility assessment, animals were maintained and allowed to develop at 15°C, then one-day adults were either kept at 15°C, or shifted to 25°C. Two days later motility behavior was scored by observing each worm for spontaneous movements over 30 seconds.

**Supplementary Table 2. *skn-1*-dependence of *daf-2* lifespan extension under dauer-independent conditions.**

| Strain                                                                    | Temp<br>[°C] | Mean<br>lifespan ±<br>S.E.M.<br>[Days] | 75 <sup>th</sup><br>per-<br>centile<br>[Days] | N assayed<br>/ Initial N | % mean<br>lifespan<br>change<br>to N2 or<br>control | % mean<br>lifespan<br>change<br>to <i>skn-1</i> | P-value<br>(log-<br>rank) vs.<br>N2 | P-value<br>(log-<br>rank) vs.<br><i>skn-1</i> | P-value<br>(log-<br>rank) vs.<br><i>daf-2</i> | Figure |
|---------------------------------------------------------------------------|--------------|----------------------------------------|-----------------------------------------------|--------------------------|-----------------------------------------------------|-------------------------------------------------|-------------------------------------|-----------------------------------------------|-----------------------------------------------|--------|
| <b>Trial at 15°C *</b>                                                    |              |                                        |                                               |                          |                                                     |                                                 |                                     |                                               |                                               |        |
| wild type (N2)                                                            | 15           | 26.5 ± 0.6                             | 31                                            | 94/115                   |                                                     |                                                 |                                     |                                               |                                               | 1a     |
| <i>skn-1</i> ( <i>zu67</i> )                                              | 15           | 19.7 ± 0.4                             | 21                                            | 84/99                    | -26                                                 |                                                 | <0.0001                             |                                               |                                               | 1a     |
| <i>daf-2</i> ( <i>e1370</i> )                                             | 15           | 38.0 ± 0.9                             | 45                                            | 134/144                  | +43                                                 | +93                                             | <0.0001                             | <0.0001                                       |                                               | 1a     |
| <i>daf-2</i> ( <i>e1370</i> ); <i>skn-1</i> ( <i>zu67</i> )               | 15           | 18.5 ± 0.4                             | 21                                            | 95/105                   |                                                     | -6                                              | <0.0001                             | 0.0676                                        | <0.0001                                       | 1a     |
| <b>Trial at 15°C *</b>                                                    |              |                                        |                                               |                          |                                                     |                                                 |                                     |                                               |                                               |        |
| wild type (N2)                                                            | 15           | 22.1 ± 0.4                             | 25                                            | 99/114                   |                                                     |                                                 |                                     |                                               |                                               | 1a     |
| <i>skn-1</i> ( <i>zu67</i> )                                              | 15           | 17.1 ± 0.3                             | 19                                            | 102/114                  | -23                                                 |                                                 | <0.0001                             |                                               |                                               | 1a     |
| <i>daf-2</i> ( <i>e1370</i> )                                             | 15           | 37.4 ± 0.9                             | 46                                            | 131/138                  | +69                                                 | +119                                            | <0.0001                             | <0.0001                                       |                                               | 1a     |
| <i>daf-2</i> ( <i>e1370</i> ); <i>skn-1</i> ( <i>zu67</i> )               | 15           | 17.7 ± 0.2                             | 19                                            | 113/116                  |                                                     | +4                                              | <0.0001                             | 0.3286                                        | <0.0001                                       | 1a     |
| <b>Trial at 15°C *</b>                                                    |              |                                        |                                               |                          |                                                     |                                                 |                                     |                                               |                                               |        |
| wild type (N2)                                                            | 15           | 21.5 ± 0.5                             | 25                                            | 86/103                   |                                                     |                                                 |                                     |                                               |                                               | 1a     |
| <i>skn-1</i> ( <i>zu67</i> )                                              | 15           | 14.2 ± 0.3                             | 16                                            | 92/102                   | -34                                                 |                                                 | <0.0001                             |                                               |                                               | 1a     |
| <i>daf-2</i> ( <i>e1370</i> )                                             | 15           | 34.3 ± 1.0                             | 42                                            | 107/114                  | +60                                                 | +142                                            | <0.0001                             | <0.0001                                       |                                               | 1a     |
| <i>daf-2</i> ( <i>e1370</i> ); <i>skn-1</i> ( <i>zu67</i> )               | 15           | 15.3 ± 0.2                             | 16                                            | 100/106                  |                                                     | +8                                              | <0.0001                             | 0.0654                                        | <0.0001                                       | 1a     |
| <b>Trial at 15°C</b>                                                      |              |                                        |                                               |                          |                                                     |                                                 |                                     |                                               |                                               |        |
| wild type (N2)                                                            | 15           | 29.2 ± 0.5                             | 34                                            | 105/110                  |                                                     |                                                 |                                     |                                               |                                               |        |
| <i>skn-1</i> ( <i>zu129</i> )                                             | 15           | 16.4 ± 0.4                             | 20                                            | 107/119                  | -44                                                 |                                                 | <0.0001                             |                                               |                                               |        |
| <i>daf-2</i> ( <i>e1370</i> )                                             | 15           | 43.6 ± 1.0                             | 50                                            | 100/102                  | +49                                                 | +166                                            | <0.0001                             | <0.0001                                       |                                               |        |
| <i>daf-2</i> ( <i>e1370</i> ); <i>skn-1</i> ( <i>zu129</i> )              | 15           | 18.1 ± 0.6                             | 22                                            | 113/123                  |                                                     | +10                                             | <0.0001                             | 0.0290                                        | <0.0001                                       |        |
| <b>Trial at 15°C</b>                                                      |              |                                        |                                               |                          |                                                     |                                                 |                                     |                                               |                                               |        |
| wild type (N2)                                                            | 15           | 24.9 ± 0.4                             | 27                                            | 106/125                  |                                                     |                                                 |                                     |                                               |                                               |        |
| <i>skn-1</i> ( <i>zu135</i> )                                             | 15           | 18.7 ± 0.3                             | 20                                            | 110/124                  | -25                                                 |                                                 | <0.0001                             |                                               |                                               |        |
| <i>daf-2</i> ( <i>e1370</i> )                                             | 15           | 33.4 ± 0.7                             | 38                                            | 125/133                  | +35                                                 | +79                                             | <0.0001                             | <0.0001                                       |                                               |        |
| <i>daf-2</i> ( <i>e1370</i> ); <i>skn-1</i> ( <i>zu135</i> )              | 15           | 20.3 ± 0.4                             | 22                                            | 91/107                   |                                                     | +9                                              | <0.0001                             | 0.0004                                        | <0.0001                                       |        |
| <b>Trial at 15°C</b>                                                      |              |                                        |                                               |                          |                                                     |                                                 |                                     |                                               |                                               |        |
| wild type (N2)                                                            | 15           | 26.6 ± 0.3                             | 27                                            | 97/109                   |                                                     |                                                 |                                     |                                               |                                               |        |
| <i>skn-1</i> ( <i>zu135</i> )                                             | 15           | 16.2 ± 0.2                             | 18                                            | 93/103                   | -39                                                 |                                                 | <0.0001                             |                                               |                                               |        |
| <i>daf-2</i> ( <i>m596</i> )                                              | 15           | 36.7 ± 0.7                             | 43                                            | 112/117                  | +38                                                 | +127                                            | <0.0001                             | <0.0001                                       |                                               |        |
| <i>daf-2</i> ( <i>m596</i> ); <i>skn-1</i> ( <i>zu135</i> )               | 15           | 17.5 ± 0.4                             | 18                                            | 91/101                   |                                                     | +8                                              | <0.0001                             | 0.0062                                        | <0.0001                                       |        |
| <b>Trial at 15°C without FUDR</b>                                         |              |                                        |                                               |                          |                                                     |                                                 |                                     |                                               |                                               |        |
| wild type (N2) without FUDR                                               | 15           | 26.7 ± 0.7                             | 30                                            | 75/112                   |                                                     |                                                 |                                     |                                               |                                               |        |
| <i>skn-1</i> ( <i>zu135</i> ) without FUDR                                | 15           | 18.4 ± 0.4                             | 20                                            | 91/119                   | -31                                                 |                                                 | <0.0001                             |                                               |                                               |        |
| <i>daf-2</i> ( <i>e1370</i> ) without FUDR                                | 15           | 35.6 ± 1.0                             | 44                                            | 64/104                   | +33                                                 | +93                                             | <0.0001                             | <0.0001                                       |                                               |        |
| <i>daf-2</i> ( <i>e1370</i> ); <i>skn-1</i> ( <i>zu135</i> ) without FUDR | 15           | 18.5 ± 0.4                             | 20                                            | 94/116                   |                                                     | +1                                              | <0.0001                             | 0.9726                                        | <0.0001                                       |        |
| <b>Trial at 15°C and 20°C **</b>                                          |              |                                        |                                               |                          |                                                     |                                                 |                                     |                                               |                                               |        |
| wild type (N2)                                                            | 15           | 22.3 ± 0.4                             | 24                                            | 91/112                   |                                                     |                                                 |                                     |                                               |                                               |        |
| <i>skn-1</i> ( <i>zu129</i> ) <sup>#</sup>                                | 15           | 19.4 ± 0.7                             | 20                                            | 95/122                   | -13                                                 |                                                 | <0.0001                             |                                               | <0.0001                                       |        |
| <i>skn-1</i> ( <i>zu135</i> ) <sup>§</sup>                                | 15           | 17.8 ± 0.2                             | 20                                            | 102/121                  | -20                                                 |                                                 | <0.0001                             |                                               | <0.0001                                       |        |
| <i>daf-2</i> ( <i>e1370</i> )                                             | 15           | 35.1 ± 0.7                             | 41                                            | 123/129                  | +57                                                 | +80 <sup>#</sup> ,<br>+97 <sup>§</sup>          | <0.0001                             |                                               |                                               |        |
| <i>daf-2</i> ( <i>e1370</i> ); <i>skn-1</i> ( <i>zu129</i> )              | 15           | 20.6 ± 0.4                             | 21                                            | 132/156                  |                                                     | +6                                              | 0.0052                              | 0.0140                                        | <0.0001                                       |        |
| <i>daf-2</i> ( <i>e1370</i> ); <i>skn-1</i> ( <i>zu135</i> )              | 15           | 19.0 ± 0.3                             | 21                                            | 108/131                  |                                                     | +7                                              | <0.0001                             | 0.0002                                        | <0.0001                                       |        |
| wild type (N2)                                                            | 20           | 19.8 ± 0.3                             | 21                                            | 116/140                  |                                                     |                                                 |                                     |                                               |                                               |        |
| <i>skn-1</i> ( <i>zu135</i> )                                             | 20           | 14.4 ± 0.5                             | 15                                            | 94/111                   | -38                                                 |                                                 | <0.0001                             |                                               |                                               |        |
| <i>daf-2</i> ( <i>e1370</i> )                                             | 20           | 30.5 ± 0.4                             | 32                                            | 141/148                  | +54                                                 | +112                                            | <0.0001                             | <0.0001                                       |                                               |        |
| <i>daf-2</i> ( <i>e1370</i> ); <i>skn-1</i> ( <i>zu135</i> )              | 20           | 29.4 ± 0.7                             | 35                                            | 111/134                  |                                                     | +104                                            | <0.0001                             | <0.0001                                       | 0.7634                                        |        |
| <b>Trial at 15°C and 20°C</b>                                             |              |                                        |                                               |                          |                                                     |                                                 |                                     |                                               |                                               |        |
| wild type (N2)                                                            | 15           | 25.7 ± 0.3                             | 27                                            | 85/92                    |                                                     |                                                 |                                     |                                               |                                               |        |
| <i>skn-1</i> ( <i>zu135</i> )                                             | 15           | 17.7 ± 0.3                             | 20                                            | 79/85                    | -31                                                 |                                                 | <0.0001                             |                                               |                                               |        |
| <i>daf-2</i> ( <i>m596</i> )                                              | 15           | 41.8 ± 0.9                             | 53                                            | 139/142                  | +63                                                 | +136                                            | <0.0001                             | <0.0001                                       |                                               |        |
| <i>daf-2</i> ( <i>m596</i> ); <i>skn-1</i> ( <i>zu135</i> )               | 15           | 17.1 ± 0.3                             | 18                                            | 99/112                   |                                                     | -3                                              | <0.0001                             | 0.3016                                        | <0.0001                                       |        |
| wild type (N2)                                                            | 20           | 23.7 ± 0.3                             | 25                                            | 84/92                    |                                                     |                                                 |                                     |                                               |                                               |        |
| <i>skn-1</i> ( <i>zu135</i> )                                             | 20           | 15.3 ± 0.2                             | 15                                            | 90/100                   | -35                                                 |                                                 | <0.0001                             |                                               |                                               |        |
| <i>daf-2</i> ( <i>m596</i> )                                              | 20           | 38.0 ± 1.1                             | 48                                            | 80/83                    | +60                                                 | +148                                            | <0.0001                             | <0.0001                                       |                                               |        |
| <i>daf-2</i> ( <i>m596</i> ); <i>skn-1</i> ( <i>zu135</i> )               | 20           | 33.8 ± 1.0                             | 41                                            | 99/112                   |                                                     | +121                                            | <0.0001                             | <0.0001                                       | 0.0130                                        |        |

| Trial at 15°C                                                         |                  |            |    |         |     |      |         |         |         |
|-----------------------------------------------------------------------|------------------|------------|----|---------|-----|------|---------|---------|---------|
| wild type (N2)                                                        | 15               | 22.1 ± 0.3 | 23 | 80/99   |     |      |         |         |         |
| <i>skn-1(zu67)</i>                                                    | 15               | 17.5 ± 0.6 | 19 | 54/83   | -20 |      | <0.0001 |         |         |
| <i>daf-2(e1368)</i>                                                   | 15               | 26.9 ± 0.4 | 30 | 136/149 | +22 | +54  | <0.0001 | <0.0001 |         |
| <i>daf-2(e1368); skn-1(zu67)</i>                                      | 15               | 16.7 ± 0.3 | 17 | 82/99   |     | -5   | <0.0001 | 0.1435  | <0.0001 |
| Trial downshifted at the first day of adulthood from 20°C to 15°C *** |                  |            |    |         |     |      |         |         |         |
| wild type (N2)                                                        | 20->15           | 27.0 ± 0.4 | 30 | 108/118 |     |      |         |         |         |
| <i>skn-1(zu67)</i>                                                    | 20->15           | 17.9 ± 0.4 | 21 | 94/108  | -34 |      | <0.0001 |         |         |
| <i>daf-2(e1370)</i>                                                   | 20->15           | 35.8 ± 1.0 | 44 | 101/124 | +33 | +100 | <0.0001 | <0.0001 |         |
| <i>daf-2(e1370); skn-1(zu67)</i>                                      | 20->15           | 21.3 ± 0.5 | 23 | 95/108  |     | +19  | <0.0001 | <0.0001 | <0.0001 |
| wild type (N2)                                                        | <b>20-&gt;20</b> | 23.9 ± 0.6 | 27 | 56/59   |     |      |         |         |         |
| <i>skn-1(zu67)</i>                                                    | <b>20-&gt;20</b> | 13.9 ± 0.3 | 14 | 34/42   | -41 |      | <0.0001 |         |         |
| <i>daf-2(e1370)</i>                                                   | <b>20-&gt;20</b> | 32.1 ± 0.8 | 35 | 54/67   | +34 | +130 | <0.0001 | <0.0001 |         |
| <i>daf-2(e1370); skn-1(zu67)</i>                                      | <b>20-&gt;20</b> | 30.1 ± 1.4 | 35 | 39/46   |     | +117 | <0.0001 | <0.0001 | 0.8980  |
| Trial at 15°C                                                         |                  |            |    |         |     |      |         |         |         |
| wild type (N2) L4440(RNAi)                                            | 15               | 23.5 ± 0.5 | 26 | 113/132 |     |      |         |         |         |
| wild type (N2) <i>daf-2</i> (RNAi)                                    | 15               | 38.1 ± 0.9 | 48 | 128/140 | +62 | +120 | <0.0001 | <0.0001 |         |
| <i>skn-1(zu135)</i> L4440(RNAi)                                       | 15               | 17.3 ± 0.6 | 19 | 89/108  | -26 |      | <0.0001 |         | <0.0001 |
| <i>skn-1(zu135) daf-2</i> (RNAi)                                      | 15               | 18.2 ± 0.5 | 19 | 118/144 |     | +5   | <0.0001 | 0.2623  | <0.0001 |
| Trial at 20°C                                                         |                  |            |    |         |     |      |         |         |         |
| wild type (N2) L4440(RNAi)                                            | 20               | 25.1 ± 0.4 | 27 | 100/115 |     |      |         |         |         |
| wild type (N2) <i>daf-2</i> (RNAi)                                    | 20               | 38.4 ± 0.7 | 43 | 102/111 | +53 | +134 | <0.0001 | <0.0001 |         |
| <i>skn-1(zu135)</i> L4440(RNAi)                                       | 20               | 16.5 ± 0.5 | 17 | 63/77   | -34 |      | <0.0001 |         | <0.0001 |
| <i>skn-1(zu135) daf-2</i> (RNAi)                                      | 20               | 19.7 ± 0.7 | 25 | 88/106  |     | +19  | <0.0001 | 0.0002  | <0.0001 |
| Trial at 15°C and 20°C                                                |                  |            |    |         |     |      |         |         |         |
| wild type (N2) <i>daf-2</i> (RNAi)                                    | 15               | 42.0 ± 1.7 | 51 | 41/56   |     | +79  |         | <0.0001 |         |
| <i>skn-1(zu135) daf-2</i> (RNAi)                                      | 15               | 23.5 ± 1.1 | 28 | 36/50   |     |      |         |         |         |
| wild type (N2) <i>daf-2</i> (RNAi)                                    | <b>20</b>        | 35.5 ± 0.6 | 38 | 53/59   |     | +79  |         | <0.0001 |         |
| <i>skn-1(zu135) daf-2</i> (RNAi)                                      | <b>20</b>        | 19.8 ± 0.8 | 23 | 42/51   |     |      |         |         |         |
| Trial at 15°C and 20°C                                                |                  |            |    |         |     |      |         |         |         |
| wild type (N2) L4440(RNAi)                                            | 15               | 29.7 ± 0.5 | 32 | 107/134 |     |      |         |         |         |
| wild type (N2) <i>daf-2</i> (RNAi)                                    | 15               | 50.2 ± 1.0 | 60 | 129/137 | +69 | +87  | <0.0001 | <0.0001 |         |
| <i>skn-1(zu135)</i> L4440(RNAi)                                       | 15               | 26.9 ± 0.5 | 30 | 110/130 | -9  |      | <0.0001 |         | <0.0001 |
| <i>skn-1(zu135) daf-2</i> (RNAi)                                      | 15               | 28.0 ± 0.7 | 32 | 77/91   |     | +4   | 0.0274  | 0.0130  | <0.0001 |
| wild type (N2) L4440(RNAi)                                            | <b>20</b>        | 24.8 ± 0.2 | 26 | 114/129 |     |      |         |         |         |
| wild type (N2) <i>daf-2</i> (RNAi)                                    | <b>20</b>        | 45.0 ± 0.8 | 49 | 96/104  | +81 | +117 | <0.0001 | <0.0001 |         |
| <i>skn-1(zu135)</i> L4440(RNAi)                                       | <b>20</b>        | 19.6 ± 0.4 | 24 | 100/117 | -21 |      | <0.0001 |         | <0.0001 |
| <i>skn-1(zu135) daf-2</i> (RNAi)                                      | <b>20</b>        | 23.4 ± 0.6 | 26 | 100/117 |     | +19  | 0.8297  | <0.0001 | <0.0001 |
| Trial of crude dauerpheromone at 25°C                                 |                  |            |    |         |     |      |         |         |         |
| wild type (N2) control                                                | <b>25</b>        | 12.6 ± 0.2 | 14 | 28/30   |     |      |         |         |         |
| wild type (N2) crude dauer pheromone                                  | <b>25</b>        | 15.9 ± 0.5 | 19 | 30/30   | +26 |      | <0.0001 |         |         |
| Trial of crude dauerpheromone at 25°C                                 |                  |            |    |         |     |      |         |         |         |
| wild type (N2) L4440(RNAi) control                                    | <b>25</b>        | 12.3 ± 0.4 | 14 | 27/30   |     |      |         |         |         |
| wild type (N2) L4440(RNAi) crude dauer pheromone                      | <b>25</b>        | 17.8 ± 0.6 | 20 | 28/30   | +45 | +60  | <0.0001 | <0.0001 |         |
| wild type (N2) <i>daf-2</i> (RNAi) control                            | <b>25</b>        | 20.9 ± 0.7 | 24 | 28/30   | +70 | +88  | <0.0001 | <0.0001 |         |
| wild type (N2) <i>daf-2</i> (RNAi) crude dauer pheromone              | <b>25</b>        | 23.7 ± 1.0 | 27 | 29/30   | +92 | +114 | <0.0001 | <0.0001 | 0.0025  |
| <i>skn-1(zu135)</i> L4440(RNAi) control                               | <b>25</b>        | 11.1 ± 0.3 | 13 | 29/30   | -10 |      | 0.0016  |         | <0.0001 |
| <i>skn-1(zu135)</i> L4440(RNAi) crude dauer pheromone                 | <b>25</b>        | 15.3 ± 0.6 | 18 | 27/30   | +24 | +38  | <0.0001 | <0.0001 | <0.0001 |
| <i>skn-1(zu135) daf-2</i> (RNAi) control                              | <b>25</b>        | 11.2 ± 0.3 | 13 | 25/30   | -9  | +1   | 0.0163  | 0.8427  | <0.0001 |
| <i>skn-1(zu135) daf-2</i> (RNAi) crude dauer pheromone                | <b>25</b>        | 17.1 ± 0.7 | 20 | 28/30   | +39 | +54  | <0.0001 | <0.0001 | 0.0003  |

Analyses that were performed in parallel are grouped together. *e1370* and *m596* are Class 2 *daf-2* alleles, and *e1368* is a Class 1 mutant<sup>1</sup>. (N) = number of animals observed; Lifespans were measured starting from the L4 stage. Animals that left the plates, buried into the agar, bagged, or exploded were censored. \*A merger of these three trials is plotted in Fig. 1c. \*\*\* animals were maintained at 20°C for several generations, then at the first day of adulthood were either kept at 20°C or downshifted to 15°C. # indicates percent *daf-2(e1370)* lifespan change to *skn-1(zu129)*. \$ indicates percent *daf-2(e1370)* lifespan change to *skn-1(zu135)*. L4440 empty vector was used as the control in RNAi experiments. 5-Fluoro-2'deoxyuridine (FUdR) was used for all lifespan assays unless otherwise indicated. \$ P-value (log-rank) vs. *daf-2(e1368)* L4440(RNAi).

For Supplementary Table 3 (complete list of *daf-2;skn-1*-up- and downregulated gene sets), please see the separate Excel file.

**Supplementary Table 4. RNAi knockdown of *daf-2;skn-1*-regulated genes affects adult lifespan**

| Strain / RNAi                                                           | Mean lifespan ± S.E.M. [Days] | 75 <sup>th</sup> percentile [Days] | N dead/ Initial N | % mean lifespan change to control | P-value (log-rank) vs. control | Figure      |
|-------------------------------------------------------------------------|-------------------------------|------------------------------------|-------------------|-----------------------------------|--------------------------------|-------------|
| Trial of genes from the SKN-1-upregulated <i>daf-2(-)</i> set at 20°C   |                               |                                    |                   |                                   |                                |             |
| <i>daf-2(e1368)</i> RNAi <b>L4440 (control)</b>                         | 26.5 ± 0.6                    | 31                                 | 64/84             |                                   |                                | Ext.Fig. 2f |
| <i>daf-2(e1368)</i> RNAi <b><i>col-13</i></b>                           | 23.7 ± 0.5                    | 25                                 | 65/84             | -11                               | 0.0004                         | Ext.Fig. 2f |
| <i>daf-2(e1368)</i> RNAi <b>K04C2.5</b>                                 | 28.5 ± 0.7                    | 34                                 | 62/70             | +8                                | 0.0253                         |             |
| <i>daf-2(e1368)</i> RNAi <b><i>col-127</i></b>                          | 25.9 ± 0.6                    | 31                                 | 58/74             | -2                                | 0.5246                         |             |
| <i>daf-2(e1368)</i> RNAi <b><i>nit-1</i></b>                            | 21.6 ± 0.5                    | 24                                 | 57/85             | -18                               | <0.0001                        | Ext.Fig. 2f |
| <i>daf-2(e1368)</i> RNAi <b><i>pgp-7</i></b>                            | 25.9 ± 0.7                    | 31                                 | 61/84             | -3                                | 0.6322                         |             |
| <i>daf-2(e1368)</i> RNAi <b>C06G1.1</b>                                 | 28.4 ± 0.7                    | 31                                 | 65/84             | +7                                | 0.0322                         |             |
| Trial of genes from the SKN-1-upregulated <i>daf-2(-)</i> set at 20°C   |                               |                                    |                   |                                   |                                |             |
| <i>daf-2(e1368)</i> RNAi <b>L4440 (control)</b>                         | 28.0 ± 0.6                    | 30                                 | 78/85             |                                   |                                | Ext.Fig. 2f |
| <i>daf-2(e1368)</i> RNAi <b>F55G11.2</b>                                | 22.1 ± 0.6                    | 25                                 | 78/85             | -21                               | <0.0001                        | Ext.Fig. 2f |
| <i>daf-2(e1368)</i> RNAi <b>K10H10.4</b>                                | 22.9 ± 0.6                    | 27                                 | 76/85             | -18                               | <0.0001                        | Ext.Fig. 2f |
| <i>daf-2(e1368)</i> RNAi <b><i>dct-5</i></b>                            | 23.8 ± 0.6                    | 27                                 | 73/85             | -15                               | <0.0001                        | Ext.Fig. 2f |
| <i>daf-2(e1368)</i> RNAi <b>F29G6.1</b>                                 | 26.3 ± 0.6                    | 30                                 | 72/85             | -6                                | 0.0785                         |             |
| <i>daf-2(e1368)</i> RNAi <b><i>nspb-7</i></b>                           | 29.5 ± 0.6                    | 32                                 | 72/85             | +5                                | 0.0454                         |             |
| Trial of genes from the SKN-1-downregulated <i>daf-2(-)</i> set at 20°C |                               |                                    |                   |                                   |                                |             |
| <i>rff-3(pk1426)</i> RNAi <b>L4440 (control)</b>                        | 16.8 ± 0.2                    | 18                                 | 64/87             |                                   |                                | Ext.Fig. 2h |
| <i>rff-3(pk1426)</i> RNAi <b><i>skr-5</i></b>                           | 18.0 ± 0.3                    | 20                                 | 56/68             | +7                                | <0.0001                        | Ext.Fig. 2h |
| <i>rff-3(pk1426)</i> RNAi <b><i>skr-8</i></b>                           | 17.7 ± 0.3                    | 19                                 | 63/80             | +5                                | 0.0038                         |             |
| Trial of genes from the SKN-1-downregulated <i>daf-2(-)</i> set at 20°C |                               |                                    |                   |                                   |                                |             |
| <i>rff-3(pk1426)</i> RNAi <b>L4440 (control)</b>                        | 18.5 ± 0.3                    | 20                                 | 60/84             |                                   |                                | Ext.Fig. 2h |
| <i>rff-3(pk1426)</i> RNAi <b><i>skr-12</i></b>                          | 18.9 ± 0.3                    | 20                                 | 56/84             | +2                                | 0.4023                         |             |
| <i>rff-3(pk1426)</i> RNAi <b><i>skr-13</i></b>                          | 19.4 ± 0.3                    | 21                                 | 68/84             | +5                                | 0.0169                         | Ext.Fig. 2h |
| <i>rff-3(pk1426)</i> RNAi <b><i>skr-17</i></b>                          | 19.6 ± 0.4                    | 23                                 | 56/72             | +6                                | 0.0219                         |             |
| Trial of genes from the SKN-1-downregulated <i>daf-2(-)</i> set at 20°C |                               |                                    |                   |                                   |                                |             |
| <i>rff-3(pk1426)</i> RNAi <b>L4440 (control)</b>                        | 20.5 ± 0.3                    | 23                                 | 73/85             |                                   |                                | Ext.Fig. 2h |
| <i>rff-3(pk1426)</i> RNAi <b><i>skr-5</i></b>                           | 21.8 ± 0.3                    | 23                                 | 72/84             | +6                                | 0.0057                         | Ext.Fig. 2h |
| <i>rff-3(pk1426)</i> RNAi <b><i>skr-12</i></b>                          | 20.6 ± 0.3                    | 23                                 | 79/83             | 0                                 | 0.7817                         |             |
| <i>rff-3(pk1426)</i> RNAi <b><i>skr-13</i></b>                          | 21.7 ± 0.3                    | 23                                 | 59/85             | +6                                | 0.0032                         | Ext.Fig. 2h |
| <i>rff-3(pk1426)</i> RNAi <b><i>skr-15</i></b>                          | 20.1 ± 0.3                    | 23                                 | 81/86             | -2                                | 0.5442                         |             |
| <i>rff-3(pk1426)</i> RNAi <b><i>skr-17</i></b>                          | 19.1 ± 0.4                    | 20                                 | 65/82             | -7                                | 0.0374                         |             |
| Trial of genes from the SKN-1-downregulated <i>daf-2(-)</i> set at 20°C |                               |                                    |                   |                                   |                                |             |
| N2 RNAi <b>L4440 (control)</b>                                          | 15.2 ± 0.3                    | 16                                 | 45/80             |                                   |                                |             |
| N2 RNAi <b>Y43C5A.3</b>                                                 | 16.2 ± 0.3                    | 17                                 | 46/65             | +7%                               | 0.0015                         |             |
| N2 RNAi <b>F48C1.8</b>                                                  | 15.8 ± 0.3                    | 17                                 | 31/60             | +4%                               | 0.1308                         |             |
| Trial of genes from the SKN-1-downregulated <i>daf-2(-)</i> set at 20°C |                               |                                    |                   |                                   |                                |             |
| <i>rff-3(pk1426)</i> RNAi <b>L4440 (control)</b>                        | 21.0 ± 0.7                    | 26                                 | 42/81             |                                   |                                |             |
| <i>rff-3(pk1426)</i> RNAi <b><i>scl-5</i></b>                           | 23.1 ± 0.5                    | 26                                 | 74/109            | +15%                              | 0.0015                         |             |
| <i>rff-3(pk1426)</i> RNAi <b>Y43C5A.3</b>                               | 21.6 ± 0.4                    | 23                                 | 75/100            | +3%                               | 0.7794                         |             |
| <i>rff-3(pk1426)</i> RNAi <b>F48C1.8</b>                                | 21.5 ± 0.4                    | 26                                 | 77/91             | +2%                               | 0.9321                         |             |
| Trial of genes from the SKN-1-downregulated <i>daf-2(-)</i> set at 20°C |                               |                                    |                   |                                   |                                |             |
| <i>rff-3(pk1426)</i> RNAi <b>L4440 (control)</b>                        | 17.8 ± 0.4                    | 21                                 | 49/76             |                                   |                                |             |
| <i>rff-3(pk1426)</i> RNAi <b>control (<i>elpc-4</i>)<sup>§</sup></b>    | 23.2 ± 0.5                    | 25                                 | 57/109            |                                   |                                | Ext.Fig. 2g |
| <i>rff-3(pk1426)</i> RNAi <b>T20D4.7</b>                                | 25.4 ± 0.3                    | 28                                 | 74/138            | +9%                               | 0.0035                         | Ext.Fig. 2g |
| <i>rff-3(pk1426)</i> RNAi <b><i>cnc-2</i></b>                           | 26.2 ± 0.5                    | 29                                 | 64/85             | +13%                              | 0.0004                         | Ext.Fig. 2g |
| <i>rff-3(pk1426)</i> RNAi <b><i>cnc-7</i></b>                           | 27.0 ± 0.5                    | 29                                 | 48/78             | +16%                              | <0.0001                        | Ext.Fig. 2g |
| <i>rff-3(pk1426)</i> RNAi <b>Y50D4B.6</b>                               | 26.3 ± 0.5                    | 28                                 | 47/92             | +13%                              | 0.0006                         |             |
| <i>rff-3(pk1426)</i> RNAi <b><i>nhr-231/nhr-170</i></b>                 | 26.5 ± 0.5                    | 29                                 | 66/149            | +14%                              | <0.0001                        | Ext.Fig. 2g |
| Trial of genes from the SKN-1-downregulated <i>daf-2(-)</i> set at 20°C |                               |                                    |                   |                                   |                                |             |
| <i>rff-3(pk1426)</i> RNAi <b>L4440 (control)</b>                        | 24.4 ± 0.3                    | 25                                 | 59/85             |                                   |                                |             |
| <i>rff-3(pk1426)</i> RNAi <b>GFP</b>                                    | 24.5 ± 0.3                    | 25                                 | 57/77             | 0%                                | 0.9282                         |             |
| <i>rff-3(pk1426)</i> RNAi <b><i>nspe-7</i></b>                          | 24.9 ± 0.4                    | 27                                 | 50/77             | +2%                               | 0.2727                         |             |
| <i>rff-3(pk1426)</i> RNAi <b>Y39B6A.24</b>                              | 25.7 ± 0.4                    | 28                                 | 56/78             | +5%                               | 0.0161                         |             |
| <i>rff-3(pk1426)</i> RNAi <b><i>cnc-2</i></b>                           | 26.6 ± 0.5                    | 28                                 | 60/81             | +9%                               | 0.0002                         |             |
| <i>rff-3(pk1426)</i> RNAi <b><i>nhr-147</i></b>                         | 24.5 ± 0.2                    | 25                                 | 68/90             | 0%                                | 0.9025                         |             |
| <i>rff-3(pk1426)</i> RNAi <b>F48C1.8</b>                                | 26.0 ± 0.4                    | 28                                 | 69/90             | +7%                               | 0.0022                         |             |
| <i>rff-3(pk1426)</i> RNAi <b><i>cnc-7</i></b>                           | 24.8 ± 0.4                    | 27                                 | 69/92             | +2%                               | 0.3516                         |             |
| <i>rff-3(pk1426)</i> RNAi <b>Y50D4B.6</b>                               | 24.0 ± 0.4                    | 25                                 | 70/90             | -2%                               | 0.3516                         |             |
| <i>rff-3(pk1426)</i> RNAi <b><i>cdr-5</i></b>                           | 25.4 ± 0.3                    | 27                                 | 74/91             | +4%                               | 0.0347                         |             |

Trials that were performed in parallel are grouped. (N) = number of animals observed; Lifespan was measured from the first day of adulthood. Animals that left the plates, buried into the agar, bagged, or exploded were censored. § in this trial *elpc-4* RNAi was used as the control. L4440 empty vector was otherwise used as the control. In some cases, knockdown was performed in the RNAi-sensitive strain *rff-3(pk1426)*<sup>2</sup>. Ext.Fig. stands for Extended Data Figure.

**Supplementary Table 5. SKN-1-downregulated *daf-2(-)* genes for which RNAi knockdown was previously found to prolong lifespan**

| SAM Rank | Gene           | Brief description                                | Reference |
|----------|----------------|--------------------------------------------------|-----------|
| 2        | <i>pes-2.2</i> | predicted F box domain                           | 3         |
| 19       | F15D3.8        |                                                  | 4         |
| 42       | Y39B6A.24      | Aspartyl protease                                | 4         |
| 53       | C31B8.4        |                                                  | 4         |
| 55       | Y43C5A.3       |                                                  | 4         |
| 73       | Y47H9C.1       | Transmembrane glycoprotein                       | 4         |
| 91       | F56D5.5        | Tropomyosin domain                               | 5         |
| 159      | <i>pos-1</i>   | CCCH-type Zn-finger protein                      | 6         |
| 175      | F55B11.3       |                                                  | 7         |
| 185      | F02D10.6       |                                                  | 8         |
| 208      | Y46G5A.20      |                                                  | 4         |
| 249      | <i>aps-3</i>   | AP-3 subunit, intracellular membrane trafficking | 9         |
| 258      | ZC196.4        |                                                  | 4         |
| 330      | <i>skr-5</i>   | SCF ubiquitin ligase, Skp1 component             | 4         |
| 334      | D1054.14       | Predicted PRP38-like splicing factor             | 6         |

**Supplementary Table 6. SKN-1 is required for the oxidative stress resistance of *daf-2* mutants**

| Strain                                           | Mean survival $\pm$ S.E.M. [Hours]                   | 75 <sup>th</sup> percentile [Hours]* | N died from stress/ Initial N   | % mean change in survival to N2 | P-value (log-rank) vs. N2 | P-value (log-rank) vs. <i>daf-2(e1370)</i> |
|--------------------------------------------------|------------------------------------------------------|--------------------------------------|---------------------------------|---------------------------------|---------------------------|--------------------------------------------|
| <b>Trial performed in parallel</b>               |                                                      |                                      |                                 |                                 |                           |                                            |
| wild type (N2) in 5mM arsenite                   | 11.7 $\pm$ 1.2                                       | 21                                   | 35/36                           |                                 |                           | <0.0001                                    |
| <i>skn-1(zu67)</i> in 5mM arsenite               | 6.7 $\pm$ 0.5                                        | 9                                    | 37/37                           | -42%                            | <0.0001                   | <0.0001                                    |
| <i>daf-2(e1370)</i> in 5mM arsenite              | 23.8 $\pm$ 1.9                                       | 31                                   | 36/39                           | +51%                            | <0.0001                   | <0.0001                                    |
| <i>daf-2(e1370); skn-1(zu67)</i> in 5mM arsenite | 8.1 $\pm$ 1.0                                        | 10                                   | 37/39                           | -31%                            | 0.0263                    | <0.0001                                    |
| <b>Trial performed in parallel</b>               |                                                      |                                      |                                 |                                 |                           |                                            |
| wild type (N2) in 5mM arsenite                   | 18.1 $\pm$ 1.8                                       | 28                                   | 29/35                           |                                 |                           | <0.0001                                    |
| <i>skn-1(zu67)</i> in 5mM arsenite               | 8.1 $\pm$ 0.8                                        | 11                                   | 29/30                           | -55%                            | <0.0001                   | <0.0001                                    |
| <i>daf-2(e1370)</i> in 5mM arsenite              | 48.1 $\pm$ 3.9                                       | 72                                   | 42/46                           | +166%                           | <0.0001                   | <0.0001                                    |
| <i>daf-2(e1370); skn-1(zu67)</i> in 5mM arsenite | 9.9 $\pm$ 2.5                                        | 11                                   | 31/32                           | -45%                            | <0.0001                   | <0.0001                                    |
| <b>Trial with 3 replicates</b>                   |                                                      |                                      |                                 |                                 |                           |                                            |
| Strain                                           | Mean survival <b>after 21 hours</b> $\pm$ S.E.M. [%] |                                      | N died from stress/ Initial N** |                                 | P-value vs. N2            | P-value vs. <i>daf-2(e1370)</i>            |
| wild type (N2) in 5mM arsenite                   | 22 $\pm$ 7.5                                         |                                      | 31/35                           |                                 |                           | <0.001                                     |
| <i>skn-1(zu67)</i> in 5mM arsenite               | 0 $\pm$ 0.0                                          |                                      | 39/39                           |                                 | >0.05                     | <0.001                                     |
| <i>daf-2(e1370)</i> in 5mM arsenite              | 70.3 $\pm$ 6.3                                       |                                      | 40/43                           |                                 | <0.001                    |                                            |
| <i>daf-2(e1370); skn-1(zu67)</i> in 5mM arsenite | 3.0 $\pm$ 3.0                                        |                                      | 35/39                           |                                 | >0.05                     | <0.0011                                    |

All assays were performed at 20°C. (As) = Arsenite; (N) = number of animals observed. Animals that exploded were censored. *P* values for survival curves were determined by Log-Rank (for survival plots) or one-way ANOVA post hoc Tukey (survival after 21 hours). In parallel control experiments performed without addition of arsenite, the frequency of death was negligible for all genotypes. SKN-1 was also required for the increased resistance of *daf-2* mutants to oxidative stress from tert-butyl hydrogen peroxide<sup>10</sup>.

**Supplementary Table 7. Overlap between SKN-1-regulated gene sets from *daf-2(-)*, normal, and oxidative stress conditions**

| Functional Annotation Cluster                                                                                                                                                                                     | Enrichment Score | Genes                                                                                                                                                                                                                                                                                                                                |
|-------------------------------------------------------------------------------------------------------------------------------------------------------------------------------------------------------------------|------------------|--------------------------------------------------------------------------------------------------------------------------------------------------------------------------------------------------------------------------------------------------------------------------------------------------------------------------------------|
| 9% of SKN-1-upregulated <i>daf-2(-)</i> genes (40 genes) were shared with <i>skn-1</i> -upregulated lists identified under normal and oxidative stress (arsenite) conditions <sup>4</sup> (Extended Data Fig. 3g) |                  |                                                                                                                                                                                                                                                                                                                                      |
| Glutathione S-transferase                                                                                                                                                                                         | 4.85             | <i>gst-4</i> , <b><i>gst-10</i></b> , <i>gst-12</i> , <b><i>gst-13</i></b> , <i>gst-14</i> , <i>gst-38</i> , <b>F56A4.4</b> , Y52E8A.3                                                                                                                                                                                               |
| Proteolysis                                                                                                                                                                                                       | 1.81             | K10C2.1*, K10C2.3, <i>pcp-2</i> , T16G12.1*                                                                                                                                                                                                                                                                                          |
| Ageing                                                                                                                                                                                                            | 1.22             | <i>dod-17</i> , <i>dod-24</i>                                                                                                                                                                                                                                                                                                        |
| others                                                                                                                                                                                                            |                  | F55G11.2, <i>nit-1</i> , F56D5.3, <b>C32H11.4</b> , <i>pgp-7*</i> , <i>nspa-8</i> , <b>C32H11.3</b> , <i>ifp-1*</i> , <i>asm-2*</i> , F14D7.6*, C33G3.4*, <i>galt-1*</i> , <i>ugt-22*</i> , <i>ubc-23*</i> , F56A4.4, F30F8.5, C46H11.2*, F55E10.6, C06E7.4, C14H10.2, D1086.3*, F09B12.3*, F38B6.4*, Y102A11A.3*, ZK287.1, C26B9.5* |
| 3% of SKN-1-downregulated <i>daf-2(-)</i> genes (13/477) were shared with <i>skn-1</i> -downregulated lists identified under normal and oxidative stress conditions <sup>4</sup>                                  |                  |                                                                                                                                                                                                                                                                                                                                      |
| others                                                                                                                                                                                                            |                  | B0348.2, C06E4.8, C31B8.4, <i>skr-5</i> , <i>vang-1</i> , <b>Y39B6A.24</b> , Y43C5A.3, Y46G5A.20, <b>Y47H9C.1</b> , Y69A2AR.25, <b>ZC196.4</b> , ZK154.5                                                                                                                                                                             |

Genes that were shown to be important for oxidative stress resistance<sup>4</sup> are underlined and shown in bold.

\* indicates SKN-1-upregulated *daf-2(-)* genes that overlap only with *skn-1*-dependent upregulated genes that were identified under normal conditions.



**Supplementary Table 8. Overrepresented gene ontology (GO) terms for *skn-1*-dependent up- and down-regulated targets under reduced insulin/IGF-1 signaling (IIS) conditions**

---

**GO terms enriched in SKN-1-upregulated *daf-2(-)* genes**

---

48 of 175 collagen genes:

*col-7, col-10, col-12, col-13, col-17, col-49, col-58, col-60, col-61, col-65, col-66, col-76, col-81, col-88, col-89, col-91, col-92, col-93, col-97, col-113, col-115, col-120, col-125, col-127, col-130, col-133, col-136, col-137, col-141, col-144, col-145, col-146, col-150, col-152, col-155, col-156, col-161, col-162, col-165, col-166, col-167, col-168, col-169, col-170, col-174, col-176, col-180, ram-2*

---

7 of 34 cuticulin precursor genes:

*cut-4, cutl-11, cutl-12, cutl-20, cutl-21, cutl-23, ram-5*

---

22 of 37 metalloproteinases genes:

*C10C5.3, C10C5.5, F45E1.5, nas-1, nas-7, nas-8, nas-22, nas-27, nas-29, nas-30, nas-36, nas-38, R11A5.7, T06A4.3, T16A9.4, T16G12.1, T19D2.1, T21D11.1, toh-1, W01A8.6, Y18H1A.9, Y47G6A.19*

---

6 of 44 glutathione S-transferase genes:

*gst-4, gst-10, gst-12, gst-13, gst-14, gst-38*

---

10 of 65 UDP-glucuronosyl transferase genes:

*F54C1.1, grl-27, ugt-4, ugt-5, ugt-6, ugt-10, ugt-22, ugt-47, ugt-51, ugt-61*

---

---

**GO terms enriched in SKN-1-downregulated *daf-2(-)* genes**

---

9 of 21 Skp1-related ubiquitin ligase components:

*skr-5, skr-7, skr-8, skr-10, skr-12, skr-13, skr-14, skr-15, skr-17*

---

22 of 390 genes containing a F-box motif:

*C47F8.1, F08F3.6, fbxa-132, fbxa-135, fbxa-153, fbxa-164, fbxa-170, fbxa-215, fbxa-36, fbxa-83, fbx-59, fbx-67, fbxc-28, fbxc-32, fbxc-33, fbxc-36, fbxc-42, fbxc-50, H04D03.4, pes-2.2, skpt-1, T02G6.5*

---

10 of 21 Broad/complex/Tramtrack/Bric a brac (BTB) domain containing genes:

*B0281.5, btb-6, btb-7, bath-9, btb-11, btb-17, bath-28, C37C3.9, 10 C17F4.8, math-10*

---

5 predicted E3 ligases:

*apc-11, B0416.4, F53F8.3, T01C3.3, Y52E8A.4*

---

3 predicted ubiquitin

*C16C8.11, F52C6.3, F54D10.7*

---

5 protease

*cpr-4, nas-3, T13B5.9, try-1, Y39B6A.24*

---

The total number of genes in a given GO term was obtained from wormbase.org WS231.

**Supplementary Table 9. Expression of *SKN-1*-upregulated *daf-2*(-) collagen genes**

| Gene           | SAM#* | SKN-1 site** | SKN-1 ChIP*** | Lifespan | Tissues expressed in adults (wormbase.org) | Expression Cluster (wormbase.org)     |
|----------------|-------|--------------|---------------|----------|--------------------------------------------|---------------------------------------|
| <i>col-13</i>  | 2     | 0            | 0             | yes      | Strong expression in adults                | no tissue-specific cluster enrichment |
| <i>col-127</i> | 7     | 0            | 0             | yes      | unknown                                    | L1_muscle enriched                    |
| <i>col-66</i>  | 16    | 0            | 0             | no       | unknown                                    | no tissue-specific cluster enrichment |
| <i>col-12</i>  | 17    | 0            | 0             | yes      | Strong expression in adults                | L1_muscle enriched                    |
| <i>col-146</i> | 18    | 0            | 0             | no       | unknown                                    | L1_muscle enriched                    |
| <i>col-176</i> | 23    | 1            | 0             | yes      | unknown                                    | L1_muscle enriched, muscle genes      |
| <i>col-65</i>  | 26    | 1            | 0             | yes      | unknown                                    | L1_muscle enriched, muscle genes      |
| <i>col-133</i> | 30    | 1            | 0             | yes      | unknown                                    | L1_muscle enriched, muscle genes      |
| <i>col-60</i>  | 41    | 0            | 0             | no       | unknown                                    | no tissue-specific cluster enrichment |
| <i>col-120</i> | 50    | 0            | 0             | yes      | unknown                                    | no tissue-specific cluster enrichment |
| <i>col-141</i> | 60    | 1            | 0             | yes      | unknown                                    | no tissue-specific cluster enrichment |
| <i>col-162</i> | 63    | 0            | 0             | no       | unknown                                    | no tissue-specific cluster enrichment |
| <i>col-180</i> | 66    | 0            | 0             | yes      | hypodermis                                 | L1_muscle enriched                    |
| <i>col-144</i> | 68    | 2            | 0             | yes      | hypodermis                                 | L1_muscle enriched                    |
| <i>col-115</i> | 73    | 0            | 0             | no       | unknown                                    | no tissue-specific cluster enrichment |
| <i>col-88</i>  | 76    | 0            | 0             | no       | unknown                                    | L1_muscle enriched                    |
| <i>col-7</i>   | 78    | 2            | 0             | no       | hypodermal, seam cells                     | L1_muscle enriched                    |
| <i>col-136</i> | 82    | 0            | 0             | no       | unknown                                    | no tissue-specific cluster enrichment |
| <i>col-167</i> | 92    | 0            | 0             | yes      | unknown                                    | no tissue-specific cluster enrichment |
| <i>col-168</i> | 100   | 0            | 0             | yes      | unknown                                    | no tissue-specific cluster enrichment |
| <i>col-145</i> | 116   | 1            | 0             | no       | unknown                                    | L1_muscle enriched                    |
| <i>col-130</i> | 127   | 0            | 0             | no       | intestine, vulva (in situ) <sup>11</sup>   | L1_muscle enriched                    |
| <i>col-150</i> | 147   | 0            | 0             | no       | unknown                                    | no tissue-specific cluster enrichment |
| <i>col-166</i> | 153   | 0            | 0             | no       | unknown                                    | no tissue-specific cluster enrichment |
| <i>col-58</i>  | 155   | 0            | 0             | no       | unknown                                    | no tissue-specific cluster enrichment |
| <i>col-156</i> | 165   | 1            | 0             | no       | unknown                                    | no tissue-specific cluster enrichment |
| <i>col-76</i>  | 167   | 1            | 0             | no       | unknown                                    | muscle enriched (emb)                 |
| <i>col-125</i> | 171   | 1            | 0             | no       | unknown                                    | L1_muscle enriched                    |
| <i>col-89</i>  | 172   | 0            | 0             | yes      | intestine, vulva, neurons <sup>12</sup>    | no tissue-specific cluster enrichment |
| <i>col-152</i> | 183   | 0            | 0             | no       | unknown                                    | no tissue-specific cluster enrichment |
| <i>col-91</i>  | 203   | 1            | 0             | no       | unknown                                    | no tissue-specific cluster enrichment |
| <i>col-174</i> | 207   | 1            | 0             | no       | unknown                                    | no tissue-specific cluster enrichment |
| <i>col-92</i>  | 212   | 0            | 0             | no       | unknown                                    | L1_muscle enriched                    |
| <i>col-170</i> | 225   | 2            | 0             | no       | unknown                                    | no tissue-specific cluster enrichment |
| <i>col-118</i> | 239   | 0            | 0             | no       | unknown                                    | L1_muscle enriched                    |
| <i>col-93</i>  | 245   | 0            | 0             | no       | unknown                                    | no tissue-specific cluster enrichment |
| <i>col-137</i> | 265   | 0            | 0             | no       | unknown                                    | no tissue-specific cluster enrichment |
| <i>col-161</i> | 289   | 0            | 0             | no       | unknown                                    | L1_muscle enriched                    |
| <i>col-155</i> | 290   | 0            | 0             | no       | unknown                                    | L1_muscle enriched                    |
| <i>col-113</i> | 301   | 0            | 0             | no       | unknown                                    | no tissue-specific cluster enrichment |
| <i>col-49</i>  | 304   | 0            | 0             | no       | unknown                                    | no tissue-specific cluster enrichment |

|                |     |   |   |     |            |                                       |
|----------------|-----|---|---|-----|------------|---------------------------------------|
| <i>col-168</i> | 336 | 1 | 0 | no  | unknown    | no tissue-specific cluster enrichment |
| <i>col-61</i>  | 341 | 0 | 0 | yes | unknown    | intestine enriched <sup>89</sup>      |
| <i>col-10</i>  | 345 | 0 | 0 | yes | hypodermis | L1_muscle enriched                    |
| <i>col-81</i>  | 361 | 1 | 0 | no  | unknown    | no tissue-specific cluster enrichment |
| <i>col-165</i> | 383 | 0 | 0 | no  | unknown    | no tissue-specific cluster enrichment |
| <i>col-17</i>  | 388 | 0 | 0 | no  | unknown    | L1_muscle enriched                    |
| <i>col-97</i>  | 429 | 0 | 0 | yes | unknown    | L1_muscle enriched                    |

\*= SAM rank number of *skn-1*-dependent upregulated genes by *daf-2(-)* (Supplementary Table 3)

\*\*= SKN-1 binding sites: TTDTCATC or GATGAHAA 1500 bp upstream of each of these genes was analyzed for presence of SKN-1 binding sites.

\*(D=A/G/T; H=T/C/A); This more restrictive version of the SKN-1 consensus motif (WWTRTACT, W=A/T, R=A/G;<sup>13</sup>) should occur randomly every 10923 bp.

\*\*\*= SKN-1 binding sites identified by genome-wide ChIP-seq using transgenically-expressed SKN-1 at the first larval stage (L1)<sup>14</sup>.

L1\_muscle enriched and/or muscle genes: mRNA pull-down by *Pmyo-3::FLAG::PAB-1*<sup>15</sup>

muscle enriched (emb): embryonic *Pmyo-3::GFP* positive cells selected for microarray<sup>16</sup>

**Supplementary Table 10. *C. elegans* collagen genes that decline in expression during ageing, and are upregulated under conditions that increase lifespan**

---

**COLLAGENS FOR WHICH EXPRESSION DECLINES WITH AGE**

---

**Of 1254 genes that changed expression during ageing, 88 were collagens were downregulated<sup>17</sup>**

---

Highest enrichment score (ES) of all gene ontology clusters: Nematode cuticle **collagens** (ES= 37.37; *P*-value 5.6E-66)

shared with SKN-1-upregulated *daf-2(-)* genes

*col-7, col-10, col-12, col-13, col-60, col-76, col-81, col-88, col-91, col-92, col-93, col-97, col-118, col-120, col-125, col-127, col-130, col-133, col-141, col-144, col-145, col-146, col-155, col-156, col-161, col-168, col-180*

---

**COLLAGENS UPREGULATED BY DRUG TREATMENTS THAT INCREASE *C. ELEGANS* LIFESPAN**

---

**8 collagens were among 116 genes induced in the wild type by Resveratrol treatment in young adults<sup>18</sup>**

---

Second highest enrichment score (ES) of all gene ontology clusters: **Collagen** triple helix repeat (ES= 2.21; *P*-value 1.7E-4)

shared with SKN-1-upregulated *daf-2(-)* genes

none

---

**85 collagens were among 1027 genes induced in *daf-16* mutants by Resveratrol treatment in young adults<sup>18</sup>**

---

Highest enrichment score (ES) of all gene ontology clusters: Nematode cuticle **collagens** (ES=47.21; *P*-value 4.6E-62)

shared with SKN-1-upregulated *daf-2(-)* genes

*col-7, col-12, col-13, col-49, col-58, col-60, col-61, col-65, col-76, col-81, col-88, col-89, col-91, col-93, col-97, col-113, col-118, col-120, col-126, col-127, col-130, col-133, col-152, col-155, col-156, col-161, col-174, ram-2*

---

**27 collagens were among 740 genes induced by Humic acid treatment in day 11 old adults<sup>19</sup>**

---

Highest enrichment score (ES) of all gene ontology clusters: **Collagen** triple helix repeat (ES= 7.17; *P*-value 6.3E-9)

shared with SKN-1-upregulated *daf-2(-)* genes

*col-13, col-92, col-93, col-167, col-133*

---

**74 collagens were among 2842 genes induced by Tannic acid treatment in young adults<sup>20</sup>**

---

Highest enrichment score (ES) of all gene ontology clusters: Nematode cuticle **collagens** (ES= 14.47; *P*-value 1.1E-25)

shared with SKN-1-upregulated *daf-2(-)* genes

*col-10, col-12, col-13, col-49, col-58, col-60, col-65, col-66, col-81, col-88, col-89, col-91, col-97, col-118, col-125, col-130, col-133, col-137, col-141, col-144, col-145, col-146, col-150, col-152, col-155, col-156, col-161, col-166, col-167, col-168, col-174, col-180, ram-2*

---

**67 collagens were among 1562 genes induced by Quercetin treatment in young adults<sup>20</sup>**

---

Highest enrichment score (ES) of all gene ontology clusters: Nematode cuticle **collagens** (ES= 19.38; *P*-value 4.0E-33)

shared with SKN-1-upregulated *daf-2(-)* genes

*col-12, col-13, col-49, col-60, col-81, col-88, col-89, col-91, col-97, col-118, col-130, col-133, col-137, col-150, col-156, col-161, col-174, col-176*

---

**64 collagens were among 2380 genes induced by Rotenone treatment in young adults<sup>21</sup>**

---

Highest enrichment score (ES) of all gene ontology clusters: Nematode cuticle **collagens** (ES= 13.63; *P*-value 5.6E-25)

shared with SKN-1-upregulated *daf-2(-)* genes

*col-10, col-49, col-58, col-60, col-61, col-65, col-88, col-89, col-91, col-97, col-113, col-125, col-130, col-133, col-137, col-141, col-145, col-146, col-150, col-152, col-155, col-156, col-161, col-162, col-170, col-176, ram-2*

---

**8 collagens were among 65 genes upregulated by MAHMA (nitric oxide donor) in wild type (N2) L4 worms<sup>22</sup>**

---

Highest enrichment score (ES) of all gene ontology clusters: Nematode cuticle **collagens** (ES= 3.25; *P*-value 7.2 E-7)

shared with SKN-1-upregulated *daf-2(-)* genes

*col-97*

---

**21 collagens were among 99 genes upregulated by MAHMA (nitric oxide donor) in *hsf-1(sy441)* L4 worms<sup>22</sup>**

---

Highest enrichment score (ES) of all gene ontology clusters: Nematode cuticle **collagens** (ES= 13.2; *P*-value 2.5 E-23)

shared with SKN-1-upregulated *daf-2(-)* genes

*col-97*

---

**COLLAGENS UPREGULATED IN GENETIC BACKGROUNDS THAT INCREASE *C. ELEGANS* LIFESPAN**

---

**41 collagens were among 2285 genes upregulated in mixed-stage *wdr-23(tm1817)* animals compared to wild type (N2)<sup>23</sup>**

---

Seventh highest enrichment score (ES) of all gene ontology clusters: Nematode cuticle **collagens** (ES= 3.91; *P*-value 5.0E-7)

shared with SKN-1-upregulated *daf-2(-)* genes

*col-10, col-17, col-76, col-125, col-144, col-145, col-152, col-156, col-166, col-167, col-168, col-169, col-170, col-176, ram-2*

---

**54 collagens were among 791 genes upregulated in young *age-1(mg44)* adults compared to wild type (N2)<sup>24</sup>**

Highest enrichment score (ES) of all gene ontology clusters: Nematode cuticle **collagens** (ES= 15.01; *P*-value 8.8E-36)

shared with SKN-1-upregulated *daf-2(-)* genes

*col-7, col-58, col-91, col-92, col-93, col-113, col-125, col-141, col-152*

---

**17 collagens were among 48 genes upregulated by *daf-2(m41)* at day 10 vs wild type at day 6 of adulthood at 25.5°C<sup>25</sup>**

Second highest enrichment score (ES) of all gene ontology clusters: **Collagen** triple helix repeat (ES= 9.25; *P*-value 2.1E-17)

shared with SKN-1-upregulated *daf-2(-)* genes

*col-141*

---

**57 collagens were among 869 genes upregulated by *daf-2(e1370)* at day 5 of adulthood<sup>26</sup>**

Highest enrichment score (ES) of all gene ontology clusters: **Collagen** triple helix repeat (ES= 23.93; *P*-value 9.5E-34)

shared with SKN-1-upregulated *daf-2(-)* genes

*col-10, col-12, col-58, col-65, col-66, col-89, col-91, col-97, col-113, col-115, col-125, col-130, col-144, col-145, col-165, col-166, col-167, col-174, ram-2*

---

**43 collagens were among 1078 DAF-16-dependent genes expressed in *daf-2(e1370)* in day 1 adults at 20°C<sup>27</sup>**

Highest enrichment score (ES) of all gene ontology clusters: Nematode cuticle **collagens** (ES= 12.3; *P*-value 6.2E-20)

shared with SKN-1-upregulated *daf-2(-)* genes

*col-60, col-88, col-91, col-92, col-93, col-130, col-137, col-141, col-146, col-150, col-155, col-161, col-165, col-169, col-170, col-176*

---

**90 collagens were among 2181 genes upregulated by TGFβ in day 1 adults<sup>27</sup>**

Highest enrichment score (ES) of all gene ontology clusters: Nematode cuticle **collagens** (ES= 25.56; *P*-value 8.4E-37)

shared with SKN-1-upregulated *daf-2(-)* genes

*col-13, col-58, col-61, col-65, col-66, col-76, col-89, col-91, col-92, col-93, col-113, col-115, col-118, col-125, col-126, col-127, col-130, col-141, col-144, col-145, col-146, col-150, col-152, col-155, col-165, col-166, col-167, col-174, col-176, col-180*

---

**31 collagens were among 549 genes were upregulated by AMPK and downstream signaling (shared transcriptional output of loss of *crh-1* (CREB) / loss of *tax-6* (calrectulin) / *AAK-2* (AMPK) overexpression) in L4 larvae<sup>28</sup>**

Highest enrichment score (ES) of all gene ontology clusters: Nematode cuticle **collagens**

shared with SKN-1-upregulated *daf-2(-)* genes

*col-12, col-13, col-91, col-126, col-127, col-133, col-137, col-141, col-145, col-146, col-150, col-155, col-156, col-167, col-168, col-176, col-180*

---

**21 collagens were among 592 genes upregulated by *ash-2(RNAi)* in day 8 adults that lacked a germline<sup>29</sup>**

Highest enrichment score (ES) of all gene ontology clusters: Nematode cuticle **collagens** (ES= 5.39; *P*-value 1.8E-7)

shared with SKN-1-upregulated *daf-2(-)* genes

*col-12, col-118, col-133, col-146*

---

**15 collagens were among 709 genes upregulated in young *isp-1* adults<sup>30</sup>**

Third highest enrichment score (ES) of all gene ontology clusters: Nematode cuticle **collagens** (ES= 2.18; *P*-value 2.6E-3)

shared with SKN-1-upregulated *daf-2(-)* genes

*col-88 col-150*

---

**51 collagens were among 2459 genes upregulated by *cyc-1(RNAi)* in young adults<sup>30</sup>**

Highest enrichment score (ES) of all gene ontology clusters: Nematode cuticle **collagens** (ES= 3.89; *P*-value 2.0E-5)

shared with SKN-1-upregulated *daf-2(-)* genes

*col-12, col-13, col-89, col-91, col-97, col-113, col-115, col-118, col-120, col-130, col-141, col-144, col-146, col-150, col-165, col-166, col-176, ram-2*

---

**13 collagens were among 155 genes upregulated in 2 day old *rsks-1(ok1255)* adults<sup>31</sup>**

Highest enrichment score (ES) of all gene ontology clusters: Nematode cuticle **collagens** (ES= 7.2; *P*-value 1.1E-8)

shared with SKN-1-upregulated *daf-2(-)* genes

*col-92, col-93 col-133*

---

**30 collagens were among 213 genes upregulated in *ctbp-1(ok498)* young adults**<sup>32</sup>

---

Highest enrichment score (ES) of all gene ontology clusters: Nematode cuticle **collagens** (ES= 24.51; *P*-value 7.5 E-29)

shared with SKN-1-upregulated *daf-2(-)* genes

*col-60, col-65, col-88, col-91, col-97, col-113, col-120, col-125, col-130, col-144, col-145, col-146, col-150, col-166, col-174, col-180*

---

Gene Ontology (GO) enrichment clusters were determined by DAVID using high classification stringency, and *P*-values were determined by DAVID using Fisher Exact test<sup>33-35</sup>. The young adult stage is defined to be 0-13 hours after the last larval molt (L4) into adulthood before eggs appear in the uterus ([www.wormbase.org](http://www.wormbase.org)). \* Temperature not specified. \*\* *daf-2(e1370)* vs *daf-2(e1370);daf-16(mu86)*. A decline in collagen gene expression with age was also observed in<sup>3,36</sup>.

**Supplementary Table 11. Collagen and extracellular matrix genes are overrepresented in mammalian longevity expression profiles**

| Comparison / GEO accession          | Species | Tissue | Total genes | # collagen | GO Cluster collagen | ES collagen | P-value | collagen genes                                                                                    | # ECM | GO cluster ECM | ES ECM | P-value | ECM genes                                                                                                                                                                                                                                                                                                     | Reference     |
|-------------------------------------|---------|--------|-------------|------------|---------------------|-------------|---------|---------------------------------------------------------------------------------------------------|-------|----------------|--------|---------|---------------------------------------------------------------------------------------------------------------------------------------------------------------------------------------------------------------------------------------------------------------------------------------------------------------|---------------|
| S6K-/- vs WT                        | Mouse   | muscle | 1021        | 5          | 60                  | 1.08        | 8.5 E-3 | COL1A2, COL4A5, Col4a1, lox, COL4A4                                                               | 26    | 28/270         | 1.36   | 2.5 E-3 | TIMP3, TRF, ADAMTSL1, LGALS3, COL4A5, COL1A2, LOC100048740, ADAMTS2, Ang, HSD17B12, CRISPLD2, WNT11, MMP11, lox, ANGPTL4, LOC100048740, ADAMTS2, Tgfbr3, TIMP3, Ang, Adams15, Eln, tgm2, LOC100048740, ADAMTS2, TIMP3, LOC100039744, LOC630776, nid1, GPC3, Col4a1, lox, COL4A4, PTN, Ang, timp4, omd, SPOCK2 | <sup>37</sup> |
| Rapamycin vs control<br>GSE41018    | Mouse   | heart  | 1638        | 12         | 17/352              | 1.26        | 7.1 E-2 | Col27a1, COL4A3, COL18A1, Colec12, C1q4, COL6A2, COL8A2, Col15a1, GLDN, col19a1, COL11A1, COL25A1 | 31    | 82/352         | 0.68   | 2.5E-1  | Adamts3, alb, Mfap1b, Mfap1a, LOC100048751, COL6A2, ADAMTS19, ANGPTL4, COL8A2, Col15a1, Prss34, COL11A1, WNT9A, MATN3, Col27a1, PODNL1, LOC100047082, Fbn2, LAMC2, adam12, LAMA4, MMP10, Rptn, adam28, Wnt16, col19a1, EMILIN3, COL4A3, COL18A1, Gpc5, CRTAC1, wnt8b, LOC677060, kazald1, OC90                | <sup>38</sup> |
| Rapamycin vs control<br>GSE41018    | Mouse   | brain  | 1208        | 9          | 43/272              | 0.85        | 1.4E-1  | COL11A1, COL6A2, Col11a2, COL1A1, C1QTNF6, ADIPOQ, COL9A1, LOC100045121, eda, COL9A1, COL4A4      | 29    | 11/352         | 1.73   | 4.4E-2  | COL6A2, ADAMTS19, FREM1, Rptn, MFAP2, Prss34, Adam15, COL11A1, OPTC, CHL1, COL1A1, Adam21, MMP13, COL9A1, MMP11, OGN, ADAM33, adam12, COL9A1, COL4A4, ABI3BP, ADAMTS20, OTOA, Col11a2, ADAMTS8, LOC640499, MMP3, FBLN1, WNT6, Matn2, Ltbp1                                                                    | <sup>38</sup> |
| Rapamycin vs control<br>GSE41018    | Mouse   | kidney | 1839        | 10         | 173/401             | 0.44        | 3.9E-1  | COL4A3, Col17a1, COL9A2, Fcna, Fcna, ADIPOQ, COL25A1, C1QL3, Col4a6, COL9A1                       | 29    | 320/401        | 0.15   | 6.4E-1  | NTN4, MATN1, Chad, Prss34, Adam15, GPC6, LOC100045283, Gm4672, lepre1, PODNL1, MMP13, OLFML2A, Col4a6, COL9A1, NEPN, timp4, Col17a1, Gpc5, SPARCL1, Rptn, Wnt16, TRF, fgf1, Adam26a, COL4A3, NTN1, LOC672215, FMOD, COL9A2, WNT11, hapln3, AHSG                                                               | <sup>38</sup> |
| Ames dwarf vs WT<br>GSE1093         | Mouse   | liver  | 152         | 4          | 15/59               | 1.34        | 2.4E-2  | COL3A1, COL4A5, Col5a1, Sftpd                                                                     | 7     | 15/59          | 1.34   | 3.4E-2  | COL3A1, COL4A5, Col5a1, Ecm1, adam28, Sftpd, Adams1                                                                                                                                                                                                                                                           | <sup>39</sup> |
| Caloric restriction (40% less Cal.) | Mouse   | liver  | 226         | 1          |                     |             |         | COL4A4                                                                                            | 10    | 4/79           | 2.82   | 7.9E-4  | Sftpd, ZP2, HAPLN1, SPARCL1, EPYC, ACAN, Tff3, Eln, COL4A4, CTGF                                                                                                                                                                                                                                              | <sup>40</sup> |

|                                                                     |       |                                          |      |    |        |      |        |                                                                                                                                                                                                       |    |        |      |        |                                                                                                                                                                                                                                                                                                                                                                                                                                                                                                                                                                                                                                 |               |
|---------------------------------------------------------------------|-------|------------------------------------------|------|----|--------|------|--------|-------------------------------------------------------------------------------------------------------------------------------------------------------------------------------------------------------|----|--------|------|--------|---------------------------------------------------------------------------------------------------------------------------------------------------------------------------------------------------------------------------------------------------------------------------------------------------------------------------------------------------------------------------------------------------------------------------------------------------------------------------------------------------------------------------------------------------------------------------------------------------------------------------------|---------------|
| vs ad libitum<br>GSE2431                                            |       |                                          |      |    |        |      |        |                                                                                                                                                                                                       |    |        |      |        |                                                                                                                                                                                                                                                                                                                                                                                                                                                                                                                                                                                                                                 |               |
| pit-1 <sup>-/-</sup> snell<br>dwarf vs WT<br><br>GSE3129            | Mouse | liver                                    | 909  | 6  | 29/263 | 1.56 | 5.1E-2 | COL11A1, Col5a1,<br>lox, TNXB, COL7A1,<br>col19a1                                                                                                                                                     | 27 | 10/263 | 2.84 | 1.6E-3 | vwf, Mmp9, FBLN2, ptrz1, MATN3, lox,<br>OGN, LOC100047888, NCAN, Eln,<br>Adams1, COL11A1, WNT7B, Ang,<br>SPARCL1, WNT2B, ANGPTL4,<br>ENTPD1, TNXB, HAPLN1, mfp4,<br>Col5a1, Lamb1-1, MMP13, AMBN, Tff3,<br>COL7A1, OGN, col19a1                                                                                                                                                                                                                                                                                                                                                                                                 | <sup>41</sup> |
| Caloric restriction<br>(40% less Cal.)<br>vs ad libitum<br>GSE39313 | Mouse | liver                                    | 228  | 3  | 48/84  | 0.63 | 2.8E1  | col4a2, Col4a1,<br>ADIPOQ                                                                                                                                                                             | 11 | 17/84  | 1.61 | 2.5E-2 | col4a2, LGALS1, TIMP3, Col4a1,<br>ANGPTL4, DCN, CTGF, DCN, timp2,<br>SLC1A3, LGALS3                                                                                                                                                                                                                                                                                                                                                                                                                                                                                                                                             | <sup>42</sup> |
| Caloric restriction<br>(40% less Cal.)<br>vs ad libitum<br>GSE39313 | Mouse | epididymal<br>white<br>adipose<br>tissue | 389  | 3  | 97/148 | 0.38 | 5.3E-1 | Col15a1, Col18a1,<br>Mbl2                                                                                                                                                                             | 15 | 62/148 | 1.21 | 8.2E-2 | Hspg2, ANGPTL4, Ccdc80, PRELP,<br>Col15a1, vtn, TRF, COL18A1, Ang,<br>LOC100046740, SPARC, SMOC1,<br>AHSG, AHSG, Ecm1                                                                                                                                                                                                                                                                                                                                                                                                                                                                                                           | <sup>42</sup> |
| GhRh <sup>-/-</sup> vs<br>control<br><br>GSE51108                   | Mouse | liver                                    | 286  | 4  | 39/97  | 0.86 | 1.1E-1 | COL4A5, COL8A1,<br>C1QB, COL3A1                                                                                                                                                                       | 18 | 13/97  | 2.16 | 9.0E-4 | Ang, CTGF, COL8A1, tgfb,<br>LOC100039744, LOC630776, nid1,<br>LGALS3, LOC100048867, ANXA2,<br>Mmp12, COL4A5, LGALS1, Ang,<br>SMOC2, LGALS1, TIMP1, COL3A1                                                                                                                                                                                                                                                                                                                                                                                                                                                                       | <sup>43</sup> |
| irs-1 <sup>-/-</sup> vs control<br>GSE36041                         | Mouse | murine<br>embryonic<br>fibroblasts       | 2507 | 22 | 22/453 | 3.28 | 5.4E-4 | Emid1, Adipoq,<br>Col2a1, Col9a1,<br>Col9a3, Col8a2,<br>Col10a1, Col11a2,<br>Col13a1, Col15a1,<br>Col17a1, Col18a1,<br>Col24a1, Col25a1,<br>Col27a1, C1qa,<br>C1ql1, C1ql4, Fcna,<br>Fcnb, Mmp9, Colq | 76 | 4/453  | 8.09 | 2.4E-9 | WNT3A, MMP9, ENAM, MMP8,<br>MMP23, GPC3, EMID1, FGF1,<br>COL11A2, USH2A, SPN, COL10A1,<br>OPTC, UCMA, ZP3, SPARCL1, EGFL6,<br>CILP, MMP11, PRELP, ADAMTS7,<br>MMP10, ADAMTS9, LAMC3, WNT9A,<br>COL24A1, EPYC, OTOA, ADAMTS18,<br>PODN, ADAMTS14, ADAMTS13,<br>SPOCK2, RBP3, ADAMTS15, ELN,<br>TIMP4, SPOCK1, COL2A1, DCN, CPZ,<br>COL9A1, SMOC2, COL17A1,<br>LGALS3BP, CRISPLD2, RPTN,<br>SMOC1, COL27A1, TNFR, IMPG2,<br>ACAN, TGM2, ADAM33, ENTPD1,<br>TECTB, COL8A2, WNT8A, DPT,<br>ANGPTL4, TECTA, COL18A1, MUC2,<br>HAPLN4, COL15A1, NTN4, PAPLN,<br>OC90, WNT2B, LAMA2, LAMA4,<br>WNT7B, LAMA3, CLEC3B, KAZALD1,<br>DMBT1 | <sup>26</sup> |



**Supplementary Table 12. Collagen and extracellular matrix genes are overrepresented in Nrf2-related expression profiles**

| Comparison / GEO accession                                               | Species | Tissue | Total genes | # collagen | GO Cluster collagen | ES collagen | P-value | collagen genes                                                                                                                                                                                         | # ECM | GO cluster ECM | ES ECM | P-value | ECM genes                                                                                                                                                                                                                                                                                                                                                                                                                                                                                                                                                                                                                                 | Ref           |
|--------------------------------------------------------------------------|---------|--------|-------------|------------|---------------------|-------------|---------|--------------------------------------------------------------------------------------------------------------------------------------------------------------------------------------------------------|-------|----------------|--------|---------|-------------------------------------------------------------------------------------------------------------------------------------------------------------------------------------------------------------------------------------------------------------------------------------------------------------------------------------------------------------------------------------------------------------------------------------------------------------------------------------------------------------------------------------------------------------------------------------------------------------------------------------------|---------------|
| Activated NRF2 by Keap1 cKO vs control GSE11287                          | Mouse   | liver  | 2752        | 15         | 127/458             | 0.78        | 1.2E-1  | Col5a3, COL11A1, COL20A1, SCARA3, COL1A2, col19a1, Pcolce, EMID1, C1qtnf7, COLQ, LOC100046355, ADIPOQ, col19a1, Col9a3, COL4A5, COL4A3                                                                 | 50    | 24/458         | 2.19   | 4.2E-3  | mmp16, BCAN, Mmp23, WNT3A, VCAN, FMOD, Wnt8a, lox11, LAMA3, DMBT1, CHL1, CHL1, TNC, ADAMTS18, col19a1, timp2, Cpz, SLC1A3, TIMP1, NAV2, FMOD, HAPLN1, ADAMTS20, col19a1, MMP3, COL4A3, Col5a3, GPC6, LOC100045283, Gm4672, Ntng1, ADAMTS5, LOC632263, ADAMTSL1, FMOD, COL1A2, CHL1, lox, WNT9A, ADAMTS5, LOC632263, MMP20, CRISPLD2, EMID1, MATN3, Wnt16, Chad, FRAS1, fn1, COL4A5, COL11A1, WNT6, SPOCK2, Hapln4, ADAMTS18, Ltbp1, HAPLN1, FBLN7, OTOG, LOC100039744, LOC630776, nid1, Gpc5, OPTC                                                                                                                                        | <sup>44</sup> |
| Nrf2 <sup>-/-</sup> vs WT GSE48879                                       | Mouse   | kidney | 2129        | 12         | 250/438             | 0.39        | 3.9E-1  | COLQ, LOC100046355, COLEC11, C1qtnf7, col14a1, SCARA5, Col16a1, Col6a3, C1qtnf3, EMID1, COL4A5, C1QTNF2                                                                                                | 32    | 395/438        | 0.08   | 7.9E-1  | VWA1, CTGF, ANGPTL4, GPC3, NTN4, DCN, OGN, LOC100046740, SPARC, Adamts1, fgf1, MMP13, SPOCK3, BGN, TIMP3, Adam17, EMID1, COL4A5, Ecm1, LOC100039744, LOC630776, nid1, Ltbp3, Col16a1, PRELP, Col6a3, Mmp2, FRAS1, Ltbp1, col14a1, Mmp12, LTBP4                                                                                                                                                                                                                                                                                                                                                                                            | <sup>45</sup> |
| Activated NRF2 by cisplatin comparing Nrf2 <sup>-/-</sup> vs WT GSE48879 | Mouse   | kidney | 2206        | 24         | 26/481              | 2.84        | 1.7E-5  | COL6A2, Col15a1, col14a1, Col27a1, COL18A1, COL1A1, COL4A5, COL4A5, COL4A4, COL4A4, col4a2, COL3A1, Col4a1, Col16a1, Col6a3, EMILIN1, COL18A1, COL6A1, COL18A1, COL1A2, col14a1, Col5a1, EMID1, COL6A1 | 72    | 2/481          | 6.85   | 4.9E-10 | NTN4, TNXB, COL6A2, Mfap1b, Mfap1a, LOC100048751, Col27a1, Adamts1, COL1A1, TIMP3, Ltbp1, COL4A4, Ecm1, ABI3BP, LOC100039744, LOC630776, nid1, Ltbp3, fn1, PRELP, LAMA5, COL18A1, lepre1, Col5a1, CTGF, AGRN, lox11, ADAMTSL2, COL6A1, TIMP1, col14a1, lox, OGN, Podn, LAMC1, MMP14, tgfb1, COL4A5, col4a2, Col4a1, LOC100046740, SPARC, Mmp2, EMILIN1, GPC3, TNC, Mmp12, LOC100048740, ADAMTS2, LAMC2, ADAMTS16, WNT9B, MMP13, ADAMTS4, COL3A1, LOC100048867, ANXA2, Col16a1, fgf1, Tgfb3, WNT9B, Lama2, NID2, LTBP4, Fbn1, Ccdc80, timp2, Col15a1, DCN, LGALS3BP, BGN, FBLN1, SPARCL1, LAMC3, Col6a3, TRF, tgm2, Lamb1-1, COL1A2, EMID1 | <sup>45</sup> |

**Supplementary Table 13. Adulthood expression of particular ECM genes promotes lifespan extension**

| Strain / RNAi                                                                                                             | Mean lifespan ± S.E.M. [Days] | 75 <sup>th</sup> percentile [Days] | N dead/ Initial N | % mean lifespan change to control | P-value (log-rank) vs. control | Figure |
|---------------------------------------------------------------------------------------------------------------------------|-------------------------------|------------------------------------|-------------------|-----------------------------------|--------------------------------|--------|
| Trial of adulthood RNAi against collagen genes from SKN-1-upregulated <i>daf-2(-)</i> set at 15°C                         |                               |                                    |                   |                                   |                                |        |
| wild type (N2) RNAi <b>L4440 (control)</b>                                                                                | 28.2 ± 0.7                    | 31                                 | 70/81             |                                   |                                |        |
| wild type (N2) RNAi <b><i>col-10</i></b>                                                                                  | 28.6 ± 0.5                    | 31                                 | 68/83             | +1                                | 0.9271                         |        |
| wild type (N2) RNAi <b><i>col-13</i></b>                                                                                  | 26.2 ± 0.6                    | 29                                 | 61/75             | -7                                | 0.0106                         |        |
| wild type (N2) RNAi <b><i>col-97</i></b>                                                                                  | 27.6 ± 0.6                    | 30                                 | 64/82             | -2                                | 0.3896                         |        |
| wild type (N2) RNAi <b><i>col-144</i></b>                                                                                 | 29.5 ± 0.6                    | 31                                 | 85/100            | +5                                | 0.2703                         |        |
| P-value and % mean lifespan change are relative to wild type (N2) RNAi L4440                                              |                               |                                    |                   |                                   |                                |        |
| <i>daf-2(e1370)</i> RNAi <b>L4440 (control)</b>                                                                           | 32.7 ± 1.0                    | 39                                 | 52/59             |                                   |                                |        |
| <i>daf-2(e1370)</i> RNAi <b><i>col-10</i></b>                                                                             | 24.7 ± 0.6                    | 30                                 | 88/115            | -24                               | <0.0001                        |        |
| <i>daf-2(e1370)</i> RNAi <b><i>col-13</i></b>                                                                             | 28.2 ± 0.7                    | 33                                 | 74/90             | -13                               | 0.0001                         |        |
| <i>daf-2(e1370)</i> RNAi <b><i>col-97</i></b>                                                                             | 30.7 ± 0.7                    | 35                                 | 81/101            | -6                                | 0.0319                         |        |
| <i>daf-2(e1370)</i> RNAi <b><i>col-144</i></b>                                                                            | 26.1 ± 0.5                    | 30                                 | 74/94             | -20                               | <0.0001                        |        |
| P-value relative and % mean lifespan change are relative to <i>daf-2(e1370)</i> RNAi L4440                                |                               |                                    |                   |                                   |                                |        |
| Trial of adulthood RNAi against collagen genes at 15°C and 20°C in parallel                                               |                               |                                    |                   |                                   |                                |        |
| <i>rrf-3(pk1426)</i> RNAi <b>L4440 15°C</b>                                                                               | 26.2 ± 0.3                    | 28                                 | 119/135           | -48                               | <0.0001                        |        |
| <i>daf-2(e1370); rrf-3(pk1426)</i> RNAi <b>L4440 15°C</b>                                                                 | 50.1 ± 0.6                    | 56                                 | 112/128           |                                   |                                |        |
| <i>daf-2(e1370); rrf-3(pk1426)</i> RNAi <b><i>daf-16</i> 15°C</b>                                                         | 20.5 ± 0.2                    | 21                                 | 105/120           | -59                               | <0.0001                        |        |
| <i>daf-2(e1370); rrf-3(pk1426)</i> RNAi <b><i>col-10</i> 15°C</b>                                                         | 32.8 ± 0.4                    | 37                                 | 90/106            | -35                               | <0.0001                        |        |
| <i>daf-2(e1370); rrf-3(pk1426)</i> RNAi <b><i>col-13</i> 15°C</b>                                                         | 33.1 ± 0.5                    | 35                                 | 95/115            | -34                               | <0.0001                        |        |
| <i>daf-2(e1370); rrf-3(pk1426)</i> RNAi <b><i>col-120</i> 15°C</b>                                                        | 31.9 ± 0.4                    | 33                                 | 99/108            | -36                               | <0.0001                        |        |
| P-value and % mean lifespan change are relative to <i>daf-2(e1370); rrf-3(pk1426)</i> RNAi L4440 15°C                     |                               |                                    |                   |                                   |                                |        |
| <i>rrf-3(pk1426)</i> RNAi <b>L4440 20°C</b>                                                                               | 23.0 ± 0.3                    | 23                                 | 91/101            | -51                               | <0.0001                        |        |
| <i>daf-2(e1370); rrf-3(pk1426)</i> RNAi <b>L4440 20°C</b>                                                                 | 47.2 ± 0.6                    | 51                                 | 104/117           |                                   |                                |        |
| <i>daf-2(e1370); rrf-3(pk1426)</i> RNAi <b><i>daf-16</i> 20°C</b>                                                         | 19.4 ± 0.2                    | 21                                 | 119/128           | -59                               | <0.0001                        |        |
| <i>daf-2(e1370); rrf-3(pk1426)</i> RNAi <b><i>col-10</i> 20°C</b>                                                         | 48.1 ± 0.5                    | 51                                 | 117/130           | +2                                | 0.1452                         |        |
| <i>daf-2(e1370); rrf-3(pk1426)</i> RNAi <b><i>col-13</i> 20°C</b>                                                         | 47.7 ± 0.6                    | 54                                 | 102/118           | +1                                | 0.1050                         |        |
| <i>daf-2(e1370); rrf-3(pk1426)</i> RNAi <b><i>col-120</i> 20°C</b>                                                        | 48.3 ± 0.5                    | 54                                 | 101/114           | +2                                | 0.0790                         |        |
| P-value and % mean lifespan change are relative to <i>daf-2(e1370); rrf-3(pk1426)</i> RNAi L4440 20°C                     |                               |                                    |                   |                                   |                                |        |
| Trial of adulthood RNAi against collagen genes at 15°C and 20°C in parallel                                               |                               |                                    |                   |                                   |                                |        |
| <i>rrf-3(pk1426)</i> RNAi <b>L4440 15°C</b>                                                                               | 29.5 ± 0.3                    | 32                                 | 121/142           | -42                               | <0.0001                        |        |
| <i>daf-2(e1370); rrf-3(pk1426)</i> RNAi <b>L4440 15°C</b>                                                                 | 50.5 ± 0.6                    | 57                                 | 113/129           |                                   |                                |        |
| <i>daf-2(e1370); rrf-3(pk1426)</i> RNAi <b><i>daf-16</i> 15°C</b>                                                         | 23.7 ± 0.3                    | 25                                 | 118/134           | -53                               | <0.0001                        |        |
| <i>daf-2(e1370); rrf-3(pk1426)</i> RNAi <b><i>col-10</i> 15°C</b>                                                         | 36.6 ± 0.6                    | 43                                 | 109/131           | -27                               | <0.0001                        |        |
| <i>daf-2(e1370); rrf-3(pk1426)</i> RNAi <b><i>col-13</i> 15°C</b>                                                         | 34.9 ± 0.6                    | 39                                 | 107/127           | -31                               | <0.0001                        |        |
| <i>daf-2(e1370); rrf-3(pk1426)</i> RNAi <b><i>col-120</i> 15°C</b>                                                        | 35.1 ± 0.6                    | 39                                 | 113/135           | -31                               | <0.0001                        |        |
| P-value and % mean lifespan change are relative to <i>daf-2(e1370); rrf-3(pk1426)</i> RNAi L4440 15°C                     |                               |                                    |                   |                                   |                                |        |
| <i>rrf-3(pk1426)</i> RNAi <b>L4440 20°C</b>                                                                               | 24.0 ± 0.2                    | 25                                 | 121/136           | -49                               | <0.0001                        |        |
| <i>daf-2(e1370); rrf-3(pk1426)</i> RNAi <b>L4440 20°C</b>                                                                 | 47.2 ± 0.7                    | 50                                 | 101/111           |                                   |                                |        |
| <i>daf-2(e1370); rrf-3(pk1426)</i> RNAi <b><i>daf-16</i> 20°C</b>                                                         | 19.3 ± 0.2                    | 21                                 | 116/128           | -59                               | <0.0001                        |        |
| <i>daf-2(e1370); rrf-3(pk1426)</i> RNAi <b><i>col-10</i> 20°C</b>                                                         | 47.4 ± 0.6                    | 53                                 | 123/132           | +0.4                              | 0.5363                         |        |
| <i>daf-2(e1370); rrf-3(pk1426)</i> RNAi <b><i>col-13</i> 20°C</b>                                                         | 46.2 ± 0.4                    | 50                                 | 117/124           | -2                                | 0.0065                         |        |
| <i>daf-2(e1370); rrf-3(pk1426)</i> RNAi <b><i>col-120</i> 20°C</b>                                                        | 47.4 ± 0.5                    | 50                                 | 103/111           | +0.4                              | 0.2526                         |        |
| P-value and % mean lifespan change are relative to <i>daf-2(e1370); rrf-3(pk1426)</i> RNAi L4440 20°C                     |                               |                                    |                   |                                   |                                |        |
| Trial of adulthood double RNAi against <i>daf-2</i> and collagen genes at 20°C                                            |                               |                                    |                   |                                   |                                |        |
| <i>rrf-3(pk1426)</i> RNAi <b>L4440/GFP</b>                                                                                | 22.8 ± 0.3                    | 23                                 | 105/116           |                                   |                                |        |
| <i>rrf-3(pk1426)</i> RNAi <b><i>daf-2</i>/GFP</b>                                                                         | 39.1 ± 0.7                    | 45                                 | 112/128           |                                   |                                |        |
| <i>rrf-3(pk1426)</i> RNAi <b><i>daf-2</i>/<i>daf-16</i></b>                                                               | 17.2 ± 0.1                    | 19                                 | 123/135           | -56                               | <0.0001                        |        |
| <i>rrf-3(pk1426)</i> RNAi <b><i>daf-2</i>/<i>skn-1</i></b>                                                                | 24.8 ± 0.5                    | 28                                 | 136/150           | -37                               | <0.0001                        |        |
| <i>rrf-3(pk1426)</i> RNAi <b><i>daf-2</i>/<i>col-10</i></b>                                                               | 30.3 ± 0.7                    | 32                                 | 112/125           | -23                               | <0.0001                        |        |
| <i>rrf-3(pk1426)</i> RNAi <b><i>daf-2</i>/<i>col-13</i></b>                                                               | 33.5 ± 0.6                    | 39                                 | 122/132           | -15                               | <0.0001                        |        |
| <i>rrf-3(pk1426)</i> RNAi <b><i>daf-2</i>/<i>col-120</i></b>                                                              | 33.8 ± 0.6                    | 39                                 | 134/144           | -14                               | <0.0001                        |        |
| P-value and % mean lifespan change are relative to <i>rrf-3(pk1426)</i> RNAi <i>daf-2</i> /GFP                            |                               |                                    |                   |                                   |                                |        |
| Trial of adulthood RNAi against collagen genes from the SKN-1-upregulated <i>daf-2(-)</i> set and 100µM Rapamycin at 20°C |                               |                                    |                   |                                   |                                |        |
| wild type (N2) RNAi <b>L4440 (control)</b> 0.2% DMSO                                                                      | 22.6 ± 0.2                    | 23                                 | 117/125           |                                   |                                |        |
| wild type (N2) RNAi <b><i>col-10</i></b> 0.2% DMSO                                                                        | 22.6 ± 0.2                    | 23                                 | 118/128           | 0                                 | 0.8799                         |        |
| wild type (N2) RNAi <b><i>col-13</i></b> 0.2% DMSO                                                                        | 22.4 ± 0.3                    | 23                                 | 80/87             | -1                                | 0.4219                         |        |
| wild type (N2) RNAi <b><i>col-120</i></b> 0.2% DMSO                                                                       | 22.7 ± 0.2                    | 23                                 | 87/94             | +1                                | 0.9361                         |        |
| P-value and % mean lifespan change are relative to wild type (N2) RNAi L4440 (control) 0.2% DMSO                          |                               |                                    |                   |                                   |                                |        |
| wild type (N2) RNAi <b>L4440 (control)</b> 0.2% DMSO 100µM Rapamycin                                                      | 27.9 ± 0.5                    | 30                                 | 110/121           |                                   |                                |        |
| wild type (N2) RNAi <b><i>col-10</i></b> 0.2% DMSO 100µM Rapamycin                                                        | 27.0 ± 0.4                    | 30                                 | 112/122           | -3                                | 0.1424                         |        |
| wild type (N2) RNAi <b><i>col-13</i></b> 0.2% DMSO 100µM Rapamycin                                                        | 26.3 ± 0.4                    | 30                                 | 116/123           | -6                                | 0.0050                         |        |
| wild type (N2) RNAi <b><i>col-120</i></b> 0.2% DMSO 100µM Rapamycin                                                       | 25.2 ± 0.3                    | 28                                 | 125/137           | -10                               | <0.0001                        |        |
| P-value and % mean lifespan change are relative to wild type (N2) RNAi L4440 (control) 0.2% DMSO 100µM Rapamycin          |                               |                                    |                   |                                   |                                |        |

| Trial of adulthood RNAi against collagen genes from the SKN-1-upregulated <i>daf-2(-)</i> set and 100μM Rapamycin at 20°C                                               |            |    |         |      |         |              |
|-------------------------------------------------------------------------------------------------------------------------------------------------------------------------|------------|----|---------|------|---------|--------------|
| wild type (N2) RNAi <b>L4440 (control)</b> 0.2% DMSO                                                                                                                    | 23.8 ± 0.5 | 25 | 48/51   |      |         |              |
| wild type (N2) RNAi <b>L4440 (control)</b> 0.2% DMSO<br>100μM Rapamycin                                                                                                 | 28.9 ± 0.7 | 32 | 55/58   | +21  | <0.0001 |              |
| wild type (N2) RNAi <b>col-13</b> 0.2% DMSO 100μM<br>Rapamycin                                                                                                          | 24.0 ± 0.8 | 25 | 43/46   | +1   | 0.7727  |              |
| wild type (N2) RNAi <b>col-120</b> 0.2% DMSO 100μM<br>Rapamycin                                                                                                         | 23.8 ± 1.3 | 29 | 35/37   | 0    | 0.5316  |              |
| P-value and % mean lifespan change are relative to wild type (N2) RNAi L4440 (control) 0.2% DMSO                                                                        |            |    |         |      |         |              |
| Trial of mutated collagen gene ( <i>dpy-1</i> ) <sup>*</sup> not upregulated in the SKN-1- <i>daf-2(-)</i> set at 15°C                                                  |            |    |         |      |         |              |
| wild type (N2)                                                                                                                                                          | 26.1 ± 0.3 | 28 | 72/86   |      |         | Ext. Fig. 4e |
| <i>dpy-1(e1)</i> (collagen)                                                                                                                                             | 25.3 ± 0.2 | 28 | 74/89   | -3   | 0.1032  | Ext. Fig. 4e |
| <i>daf-2(e1370)</i>                                                                                                                                                     | 37.5 ± 0.6 | 42 | 77/85   | +43  | <0.0001 | Ext. Fig. 4e |
| <i>dpy-1(e1) daf-2(e1370)</i>                                                                                                                                           | 25.6 ± 0.3 | 26 | 63/75   | -2   | 0.1714  | Ext. Fig. 4e |
| P-value and % mean lifespan change are relative to wild type (N2)                                                                                                       |            |    |         |      |         |              |
| Trial of adulthood RNAi against collagen and protease genes from the SKN-1-upregulated <i>daf-2(-)</i> set, cuticle surface barrier and basement membrane genes at 15°C |            |    |         |      |         |              |
| <i>rrf-3(pk1426)</i> RNAi <b>L4440 (control)</b>                                                                                                                        | 26.4 ± 0.3 | 29 | 108/120 |      |         | Ext. Fig. 4f |
| <i>rrf-3(pk1426)</i> RNAi <b>col-61 (intestinal expressed collagen)</b>                                                                                                 | 27.9 ± 0.3 | 30 | 87/94   | +6   | 0.0284  |              |
| <i>rrf-3(pk1426)</i> RNAi <b>col-89 (intestinal expressed collagen)</b>                                                                                                 | 27.9 ± 0.3 | 30 | 91/96   | +6   | 0.0139  |              |
| <i>rrf-3(pk1426)</i> RNAi <b>asp-14 (Protease)</b>                                                                                                                      | 28.0 ± 0.3 | 30 | 105/116 | +6   | 0.0018  |              |
| <i>rrf-3(pk1426)</i> RNAi <b>C54D10.10 (Protease)</b>                                                                                                                   | 27.7 ± 0.2 | 30 | 104/115 | +5   | 0.0217  |              |
| <i>rrf-3(pk1426)</i> RNAi <b>nas-1 (Protease)</b>                                                                                                                       | 27.7 ± 0.3 | 30 | 81/91   | +5   | 0.0341  |              |
| <i>rrf-3(pk1426)</i> RNAi <b>nas-36 (Protease)</b>                                                                                                                      | 27.3 ± 0.3 | 30 | 98/109  | +3   | 0.1163  |              |
| <i>rrf-3(pk1426)</i> RNAi <b>suro-1 (Protease)</b>                                                                                                                      | 31.3 ± 0.7 | 37 | 118/132 | +19  | <0.0001 |              |
| <i>rrf-3(pk1426)</i> RNAi <b>T16G12.1 (Protease)</b>                                                                                                                    | 31.9 ± 0.4 | 37 | 104/118 | +21  | <0.0001 |              |
| <i>rrf-3(pk1426)</i> RNAi <b>toh-1 (Protease)</b>                                                                                                                       | 28.4 ± 0.3 | 32 | 100/117 | +8   | <0.0001 |              |
| <i>rrf-3(pk1426)</i> RNAi <b>W01A8.6 (Protease)</b>                                                                                                                     | 27.8 ± 0.2 | 30 | 105/117 | +5   | 0.0193  |              |
| <i>rrf-3(pk1426)</i> RNAi <b>acs-20 (cuticle surface barrier)</b>                                                                                                       | 26.9 ± 0.4 | 30 | 82/90   | +2   | 0.5992  |              |
| <i>rrf-3(pk1426)</i> RNAi <b>acs-22 (cuticle surface barrier)</b>                                                                                                       | 24.2 ± 0.3 | 25 | 108/122 | -8   | <0.0001 |              |
| <i>rrf-3(pk1426)</i> RNAi <b>epi-1 (basement membrane)</b>                                                                                                              | 27.7 ± 0.3 | 30 | 116/120 | +5   | 0.0203  |              |
| <i>rrf-3(pk1426)</i> RNAi <b>let-2 (basement membrane)</b>                                                                                                              | 26.9 ± 0.4 | 28 | 69/75   | +2   | 0.5942  |              |
| <i>rrf-3(pk1426)</i> RNAi <b>tsp-15 (basement membrane)</b>                                                                                                             | 28.1 ± 0.2 | 30 | 104/115 | +6   | 0.0024  |              |
| P-value and % mean lifespan change are relative to <i>rrf-3(pk1426)</i> RNAi L4440 (control)                                                                            |            |    |         |      |         |              |
| <i>daf-2(e1370); rrf-3(pk1426)</i> RNAi <b>L4440 (control)</b>                                                                                                          | 47.8 ± 0.5 | 52 | 114/130 |      |         | Ext. Fig. 4f |
| <i>daf-2(e1370); rrf-3(pk1426)</i> RNAi <b>col-61 (intestinal expressed collagen)</b>                                                                                   | 41.9 ± 0.8 | 46 | 83/88   | -12  | <0.0001 |              |
| <i>daf-2(e1370); rrf-3(pk1426)</i> RNAi <b>col-89 (intestinal expressed collagen)</b>                                                                                   | 46.8 ± 0.9 | 56 | 95/100  | -2   | 0.4294  |              |
| <i>daf-2(e1370); rrf-3(pk1426)</i> RNAi <b>asp-14 (Protease)</b>                                                                                                        | 36.1 ± 0.6 | 41 | 104/114 | -24  | <0.0001 | Ext. Fig. 4f |
| <i>daf-2(e1370); rrf-3(pk1426)</i> RNAi <b>C54D10.10 (Protease)</b>                                                                                                     | 45.0 ± 0.3 | 46 | 101/108 | -6   | <0.0001 |              |
| <i>daf-2(e1370); rrf-3(pk1426)</i> RNAi <b>nas-1 (Protease)</b>                                                                                                         | 44.6 ± 0.5 | 49 | 112/119 | -7   | <0.0001 |              |
| <i>daf-2(e1370); rrf-3(pk1426)</i> RNAi <b>nas-36 (Protease)</b>                                                                                                        | 46.2 ± 0.6 | 49 | 116/121 | -3   | 0.2931  |              |
| <i>daf-2(e1370); rrf-3(pk1426)</i> RNAi <b>suro-1 (Protease)</b>                                                                                                        | 37.6 ± 0.7 | 46 | 103/120 | -21  | <0.0001 | Ext. Fig. 4f |
| <i>daf-2(e1370); rrf-3(pk1426)</i> RNAi <b>T16G12.1 (Protease)</b>                                                                                                      | 45.5 ± 0.5 | 49 | 103/115 | -5   | 0.0026  |              |
| <i>daf-2(e1370); rrf-3(pk1426)</i> RNAi <b>toh-1 (Protease)</b>                                                                                                         | 45.1 ± 0.4 | 49 | 115/128 | -6   | <0.0001 |              |
| <i>daf-2(e1370); rrf-3(pk1426)</i> RNAi <b>W01A8.6 (Protease)</b>                                                                                                       | 43.8 ± 0.6 | 49 | 109/123 | -8   | 0.0015  |              |
| <i>daf-2(e1370); rrf-3(pk1426)</i> RNAi <b>acs-20 (cuticle surface barrier)</b>                                                                                         | 32.1 ± 0.5 | 36 | 124/138 | -33  | <0.0001 | Ext. Fig. 4f |
| <i>daf-2(e1370); rrf-3(pk1426)</i> RNAi <b>acs-22 (cuticle surface barrier)</b>                                                                                         | 29.7 ± 0.5 | 32 | 107/122 | -38  | <0.0001 | Ext. Fig. 4f |
| <i>daf-2(e1370); rrf-3(pk1426)</i> RNAi <b>epi-1 (basement membrane)</b>                                                                                                | 47.6 ± 0.8 | 52 | 79/86   | -0.4 | 0.6226  |              |
| <i>daf-2(e1370); rrf-3(pk1426)</i> RNAi <b>let-2 (basement membrane)</b>                                                                                                | 42.9 ± 0.7 | 49 | 118/128 | -10  | 0.0003  |              |
| <i>daf-2(e1370); rrf-3(pk1426)</i> RNAi <b>tsp-15 (basement membrane)</b>                                                                                               | 40.7 ± 0.6 | 46 | 106/132 | -15  | <0.0001 |              |
| P-value and % mean lifespan change are relative to <i>daf-2(e1370); rrf-3(pk1426)</i> RNAi L4440 (control)                                                              |            |    |         |      |         |              |
| Trial of collagen overexpression at 20°C                                                                                                                                |            |    |         |      |         |              |
| wild type (N2)                                                                                                                                                          | 22.6 ± 0.3 | 25 | 65/79   | +0.4 | 0.7880  |              |
| <i>ldEx102 [rol-6(su1006)] control</i>                                                                                                                                  | 22.5 ± 0.3 | 25 | 60/71   |      |         |              |
| <i>ldEx103 [COL-10; rol-6(su1006)]</i>                                                                                                                                  | 24.8 ± 0.4 | 27 | 75/85   | +10  | <0.0001 |              |
| <i>ldEx104 [COL-10; rol-6(su1006)]</i>                                                                                                                                  | 24.3 ± 0.4 | 27 | 60/70   | +8   | 0.0004  |              |

|                                                          |            |    |       |     |         |  |
|----------------------------------------------------------|------------|----|-------|-----|---------|--|
| <i>ldEx105</i> [COL-13; <i>rol-6</i> ( <i>su1006</i> )]  | 25.2 ± 0.4 | 27 | 67/76 | +12 | <0.0001 |  |
| <i>ldEx106</i> [COL-13; <i>rol-6</i> ( <i>su1006</i> )]  | 24.4 ± 0.4 | 27 | 82/93 | +8  | <0.0001 |  |
| <i>ldEx107</i> [COL-13; <i>rol-6</i> ( <i>su1006</i> )]  | 24.2 ± 0.4 | 27 | 55/66 | +8  | 0.0007  |  |
| <i>ldEx108</i> [COL-13; <i>rol-6</i> ( <i>su1006</i> )]  | 25.5 ± 0.4 | 27 | 77/84 | +13 | <0.0001 |  |
| <i>ldEx109</i> [COL-120; <i>rol-6</i> ( <i>su1006</i> )] | 23.3 ± 0.4 | 25 | 58/69 | +4  | 0.1570  |  |
| <i>ldEx110</i> [COL-120; <i>rol-6</i> ( <i>su1006</i> )] | 23.4 ± 0.3 | 25 | 72/84 | +4  | 0.0391  |  |

P-value and % mean lifespan change are relative to *ldEx102* [ROL-16(*su1006*)] control

Trial of collagen overexpression at 20°C

|                                                                          |            |    |       |     |         |    |
|--------------------------------------------------------------------------|------------|----|-------|-----|---------|----|
| wild type (N2)                                                           | 22.7 ± 0.4 | 25 | 55/65 | 0   | 0.8246  |    |
| <i>ldEx102</i> [ <i>rol-6</i> ( <i>su1006</i> )] control                 | 22.7 ± 0.3 | 23 | 60/67 |     |         | 3f |
| <i>ldEx103</i> [COL-10; <i>rol-6</i> ( <i>su1006</i> )]                  | 24.3 ± 0.5 | 28 | 69/77 | +7  | 0.0008  | 3f |
| <i>ldEx104</i> [COL-10; <i>rol-6</i> ( <i>su1006</i> )]                  | 23.3 ± 0.5 | 25 | 50/59 | +3  | 0.0843  |    |
| <i>ldEx106</i> [COL-13; <i>rol-6</i> ( <i>su1006</i> )]                  | 24.0 ± 0.4 | 25 | 80/86 | +6  | 0.0046  |    |
| <i>ldEx108</i> [COL-13; <i>rol-6</i> ( <i>su1006</i> )]                  | 25.5 ± 0.4 | 28 | 91/99 | +12 | <0.0001 | 3f |
| <i>ldEx109</i> [COL-120; <i>rol-6</i> ( <i>su1006</i> )]                 | 24.7 ± 0.5 | 25 | 49/60 | +9  | 0.0005  |    |
| <i>ldEx110</i> [COL-120; <i>rol-6</i> ( <i>su1006</i> )]                 | 25.5 ± 0.4 | 28 | 79/84 | +12 | <0.0001 | 3f |
| <i>ldEx111</i> [COL-10; COL-13; COL-120; <i>rol-6</i> ( <i>su1006</i> )] | 23.9 ± 0.6 | 28 | 46/60 | +5  | 0.0204  | 3f |

P-value and % mean lifespan change are relative to *ldEx102* [ROL-16(*su1006*)] control

Trial of collagen overexpression at 20°C

|                                                                          |            |    |       |      |        |  |
|--------------------------------------------------------------------------|------------|----|-------|------|--------|--|
| wild type (N2)                                                           | 21.0 ± 0.4 | 22 | 46/53 | -0.5 | 0.9074 |  |
| <i>ldEx102</i> [ <i>rol-6</i> ( <i>su1006</i> )] control                 | 21.1 ± 0.3 | 22 | 60/66 |      |        |  |
| <i>ldEx111</i> [COL-10; COL-13; COL-120; <i>rol-6</i> ( <i>su1006</i> )] | 23.6 ± 0.6 | 28 | 50/54 | +12  | 0.0001 |  |

P-value and % mean lifespan change are relative to *ldEx102* [ROL-16(*su1006*)] control

Trial of overexpression of collagen and extracellular matrix genes not upregulated in the SKN-1- *daf-2*(-) set at 20°C

|                                                               |            |    |        |    |        |  |
|---------------------------------------------------------------|------------|----|--------|----|--------|--|
| wild type (N2)                                                | 23.1 ± 0.4 | 25 | 52/66  |    |        |  |
| <i>kals12</i> [COL-19::GFP] (adult specific collagen)         | 23.6 ± 0.4 | 25 | 54/63  | +2 | 0.3474 |  |
| <i>kuls55</i> [LON-3::GFP] (collagen)                         | 22.1 ± 0.3 | 23 | 54/79  | -4 | 0.0185 |  |
| <i>chEx1682</i> [QUA-1::GFP] (peptidase required for molting) | 22.6 ± 0.3 | 23 | 58/69  | -2 | 0.1328 |  |
| <i>upls1</i> [MUP-4::GFP] (anchors muscle-hypodermis-cuticle) | 22.5 ± 0.2 | 23 | 95/115 | -3 | 0.0408 |  |

P-value and % mean lifespan change are relative to wild type (N2)

Trials that were performed in parallel are grouped. (N) = number of animals observed; Lifespan was measured from the L4 stage. Animals that left the plates, buried into the agar, bagged, or exploded were censored. L4440 empty vector was otherwise used as the control. In some cases, knockdown was performed in the RNAi-sensitive strain *rrf-3(pk1426)*<sup>2</sup>. *col-10*, *col-12*, and *col-97* share >99% protein sequence identity with *col-144*, *col-13*, and *col-109*, respectively. \**dpy-1(e1)* affects body length and alae formation<sup>46,47</sup>. For collagen overexpression trials, the extent of overexpression was determined by qRT-PCR. All transgenic lines had significant higher mRNA levels compared to wild type (N2) determined by one sample *t*-test, two-tailed, hypothetical mean of 1 was used for comparison: *ldEx103 col-10* = 6.9±0.6-fold, *ldEx104 col-10* = 10.9±0.3-fold, *ldEx106 col-13* = 12.7±0.8-fold, *ldEx108 col-13* = 4.7±0.6-fold, *ldEx109 col-120* = 3.3±0.6-fold, *ldEx110 col-120* = 5.1±0.5-fold relative mRNA levels to wild type (mean ±S.E.M.).

**Supplementary Table 14. Potential crossover effects of collagen gene RNAi**

| Collagen       | Sequence name | Coding seq. length (nt) | RNAi clone length (nt) | Paralogues*                                                                       | Homology region >300nt                                                                 | Homology region 200-300nt                                                           |
|----------------|---------------|-------------------------|------------------------|-----------------------------------------------------------------------------------|----------------------------------------------------------------------------------------|-------------------------------------------------------------------------------------|
| <i>col-10</i>  | B0222.8       | 885                     | 885                    | <i>col-144</i>                                                                    | <i>col-145</i>                                                                         | <i>col-126</i><br><i>col-127</i><br><i>col-130</i>                                  |
| <i>col-13</i>  | F15H10.2      | 951                     | 951                    | <i>col-12</i>                                                                     | <i>col-159</i><br><i>col-160</i>                                                       | <i>col-137</i><br><i>col-136</i>                                                    |
| <i>col-65</i>  | K08C9.4       | 906                     | 906                    |                                                                                   | <i>col-107</i>                                                                         | none                                                                                |
| <i>col-120</i> | Y11D7A.11     | 942                     | 942                    |                                                                                   | none                                                                                   | none                                                                                |
| <i>col-127</i> | F54D1.3       | 885                     | 885                    | <i>col-126</i><br><i>col-145</i>                                                  |                                                                                        | <i>col-144</i><br><i>col-10</i><br><i>col-130</i>                                   |
| <i>col-133</i> | F52B11.4      | 915                     | 915                    | <i>col-92</i><br><i>col-93</i><br><i>col-94</i><br><i>col-95</i><br><i>col-96</i> |                                                                                        | <i>col-154</i><br><i>col-155</i><br><i>col-157</i><br><i>sqt-3</i><br><i>col-43</i> |
| <i>col-141</i> | T15B7.5       | 945                     | 945                    | <i>col-142</i>                                                                    | <i>col-143</i>                                                                         | <i>col-146</i><br><i>col-147</i>                                                    |
| <i>col-167</i> | T10E10.2      | 906                     | 906                    | <i>col-168</i><br><i>col-169</i>                                                  | <i>col-171</i><br><i>col-166</i><br><i>col-180</i>                                     | none                                                                                |
| <i>col-180</i> | C44C10.1      | 903                     | 903                    | <i>col-170</i>                                                                    | <i>col-166</i><br><i>col-167</i><br><i>col-168</i><br><i>col-169</i><br><i>col-171</i> | none                                                                                |

\*Paralogues are defined here to share >95% identical amino acid sequence. Homology region is defined as >80% nucleotide(nt) sequence identity with a minimum of 25nt stretch of uninterrupted identical sequence.

**Supplementary Table 15. Effects of longevity interventions on 26 proteases upregulated by SKN-1 under rlls conditions**

| SAM Rank | Public Name             | Seq name         | KOG (euKaryotic Orthologous Group) Title                              | Score(d)     | SKN-1 site*<br>TTDTCATC<br>GATGAHAA | <i>daf-2(-)</i> vs wild type day 5 adults | <i>daf-2(-)</i> ; DAF-16-dependent up | <i>age-1(-)</i> (PI3K) vs wild type | TGF- $\beta$ vs wild type adults | Humic acid day 11 adults | Quercetin in young adults | <i>cyc-1(-)</i> vs wild type | Resveratrol young adults |
|----------|-------------------------|------------------|-----------------------------------------------------------------------|--------------|-------------------------------------|-------------------------------------------|---------------------------------------|-------------------------------------|----------------------------------|--------------------------|---------------------------|------------------------------|--------------------------|
|          |                         |                  |                                                                       |              |                                     | 26                                        | 27                                    | 24                                  | 27                               | 19                       | 20                        | 30                           | 18                       |
| 4        | <b><i>asp-14</i></b>    | <b>K10C2.3</b>   | <b>Aspartyl protease</b>                                              | <b>4.116</b> | <b>0</b>                            |                                           |                                       | <b>up</b>                           | <b>up</b>                        | <b>up</b>                |                           |                              |                          |
| 6        | <i>nas-7</i>            | C07D10.4         | Meprin A metalloprotease (astacin-like protease)                      | 3.987        | 1                                   | up                                        |                                       |                                     | up                               |                          |                           |                              |                          |
| 33       | <i>T21D11.1</i>         | T21D11.1         | Gelatinase A and related matrix metalloproteases                      | 3.133        | 1                                   | up                                        |                                       |                                     |                                  |                          |                           |                              |                          |
| 35       | <b><i>C54D10.10</i></b> | <b>C54D10.10</b> | <b>predicted serine-type endopeptidase inhibitor activity</b>         | <b>3.096</b> | <b>2</b>                            |                                           | <b>up</b>                             |                                     | <b>up</b>                        |                          |                           |                              |                          |
| 48       | <b><i>nas-1</i></b>     | <b>F45G2.1</b>   | <b>Meprin A metalloprotease (astacin-like protease)</b>               | <b>2.867</b> | <b>1</b>                            | <b>up</b>                                 |                                       |                                     |                                  |                          |                           |                              |                          |
| 54       | <b><i>W01A8.6</i></b>   | <b>W01A8.6</b>   | <b>metallocarboxypeptidase activity</b>                               | <b>2.802</b> | <b>1</b>                            | <b>up</b>                                 |                                       |                                     | <b>up</b>                        |                          | <b>up</b>                 |                              |                          |
| 93       | <b><i>nas-36</i></b>    | <b>C26C6.3</b>   | <b>Meprin A metalloprotease (astacin-like protease)</b>               | <b>2.439</b> | <b>0</b>                            |                                           |                                       |                                     |                                  |                          |                           |                              | <b>up</b>                |
| 98       | <i>nas-27</i>           | T23F4.4          | Meprin A metalloprotease (astacin-like protease)                      | 2.411        | 1                                   |                                           |                                       |                                     |                                  |                          |                           |                              |                          |
| 103      | <b><i>T16G12.1</i></b>  | <b>T16G12.1</b>  | <b>Puromycin-sensitive aminopeptidase and related aminopeptidases</b> | <b>2.404</b> | <b>0</b>                            |                                           |                                       |                                     | <b>up</b>                        |                          |                           | <b>up</b>                    |                          |
| 109      | <i>nas-8</i>            | C34D4.9          | Meprin A metalloprotease (astacin-like protease)                      | 2.333        | 0                                   | up                                        |                                       |                                     |                                  |                          |                           |                              |                          |
| 139      | <i>nas-22</i>           | T11F9.6          | Meprin A metalloprotease (astacin-like protease)                      | 2.245        | 0                                   |                                           |                                       |                                     |                                  |                          |                           |                              |                          |
| 148      | <b><i>toh-1</i></b>     | <b>T24A11.3</b>  | <b>Meprin A metalloprotease (astacin-like protease)</b>               | <b>2.183</b> | <b>0</b>                            |                                           | <b>up</b>                             |                                     | <b>up</b>                        |                          |                           | <b>up</b>                    | <b>up</b>                |
| 152      | <i>C10C5.3</i>          | C10C5.3          | Aminoacylase ACY1 and related metalloexopeptidases                    | 2.165        | 3                                   |                                           |                                       |                                     |                                  |                          |                           | <b>up</b>                    |                          |
| 184      | <i>nas-29</i>           | F58A6.4          | astacin-like protease                                                 | 2.076        | 0                                   |                                           |                                       |                                     |                                  |                          |                           |                              |                          |
| 185      | <i>C10C5.5</i>          | C10C5.5          | Aminoacylase ACY1 and related metalloexopeptidases                    | 2.072        | 0                                   |                                           |                                       |                                     |                                  |                          |                           |                              |                          |
| 243      | <i>T19D2.1</i>          | T19D2.1          | Metallopeptidase                                                      | 1.926        | 3                                   | up                                        |                                       |                                     |                                  |                          |                           | <b>up</b>                    |                          |
| 259      | <i>nas-38</i>           | F57C12.1         | Meprin A metalloprotease (astacin-like protease)                      | 1.904        | 0                                   | up                                        |                                       |                                     | up                               |                          |                           |                              |                          |
| 272      | <i>F45E1.5</i>          | F45E1.5          | carboxypeptidase A                                                    | 1.886        | 0                                   | up                                        |                                       |                                     |                                  |                          |                           |                              |                          |
| 287      | <i>T06A4.3</i>          | T06A4.3          | Zinc carboxypeptidase                                                 | 1.861        | 0                                   |                                           |                                       |                                     |                                  |                          |                           |                              |                          |
| 294      | <i>nep-21</i>           | T16A9.4          | M13 family peptidase (neprilysin)                                     | 1.843        | 0                                   |                                           |                                       |                                     |                                  |                          |                           |                              |                          |
| 299      | <i>nas-30</i>           | Y95B8A.1         | Meprin A metalloprotease (astacin-like protease)                      | 1.84         | 0                                   | up                                        |                                       |                                     | up                               |                          |                           | <b>up</b>                    |                          |
| 303      | <i>nas-22</i>           | T11F9.6          | Meprin A metalloprotease (astacin-like protease)                      | 1.83         | 0                                   |                                           |                                       |                                     |                                  |                          |                           |                              |                          |
| 349      | <b><i>suro-1</i></b>    | <b>R11A5.7</b>   | <b>Zinc carboxypeptidase</b>                                          | <b>1.743</b> | <b>0</b>                            | <b>up</b>                                 |                                       |                                     | <b>up</b>                        |                          |                           |                              |                          |
| 360      | <i>Y47G6A.19</i>        | Y47G6A.19        | Zinc carboxypeptidase                                                 | 1.736        | 0                                   |                                           |                                       |                                     | up                               |                          |                           |                              |                          |
| 410      | <i>K10C2.1</i>          | K10C2.1          | Serine carboxypeptidases (lysosomal cathepsin A)                      | 1.675        | 1                                   |                                           |                                       |                                     |                                  |                          |                           |                              |                          |
| 427      | <i>Y18H1A.9</i>         | Y18H1A.9         | Zinc carboxypeptidase                                                 | 1.659        | 0                                   | up                                        |                                       |                                     |                                  |                          |                           |                              |                          |

\*= SAM rank number of *skn-1*-dependent upregulated genes by *daf-2(-)* (Supplementary Table 3)

\*\*= SKN-1 binding sites: **TTDTCAIC** or **GATGAHAA** 1500 bp upstream of each of these genes was analyzed for presence of SKN-1 binding sites. \*(D=A/G/T; H=T/C/A); This more restrictive version of the SKN-1 consensus motif (WWTRTACT, W=A/T, R=A/G;<sup>13</sup>) should occur randomly every 10923bp.

In bold are the 8 out of the 26 *daf-2(-)*; SKN-1-dependent upregulated protease genes that were tested for their effects on wild type lifespan and *daf-2(e1370)* longevity at 15°C.

**Supplementary Table 16. Adulthood knockdown of collagen genes sensitizes to t-BOOH or Arsenite oxidative stress**

| Strain                                                                                                                                                                                                                                                                                 | Temp. [°C]                                | Mean survival ± S.E.M. [hours] | 75 <sup>th</sup> percentile [hours]      | max. survival [hours] | N died from t-BOOH/Initial N | % mean lifespan change to L4440 (RNAi) | P-value (log-rank) vs. L4440 (RNAi) | P-value (log-rank) vs. <i>skn-1</i> (RNAi) | P-value (log-rank) vs. <i>daf-2</i> (RNAi) | Figure |
|----------------------------------------------------------------------------------------------------------------------------------------------------------------------------------------------------------------------------------------------------------------------------------------|-------------------------------------------|--------------------------------|------------------------------------------|-----------------------|------------------------------|----------------------------------------|-------------------------------------|--------------------------------------------|--------------------------------------------|--------|
| Parallel trial using 15.4 mM t-BOOH at 20°C                                                                                                                                                                                                                                            |                                           |                                |                                          |                       |                              |                                        |                                     |                                            |                                            |        |
| N2 L4440(RNAi)                                                                                                                                                                                                                                                                         | 20                                        | 10.5 ± 0.4                     | 12                                       | 16                    | 44/61                        |                                        |                                     |                                            |                                            |        |
| N2 <i>skn-1</i> (RNAi)                                                                                                                                                                                                                                                                 | 20                                        | 5.9 ± 0.2                      | 6                                        |                       | 27/42                        | -44                                    | <0.0001                             |                                            |                                            |        |
| N2 <i>daf-2</i> (RNAi)*                                                                                                                                                                                                                                                                | 20                                        | 13.6 ± 0.4                     | 16                                       | -                     | 50/76                        | +30                                    | <0.0001                             | <0.0001                                    |                                            |        |
| N2 <i>col-120</i> (RNAi)                                                                                                                                                                                                                                                               | 20                                        | 7.8 ± 0.3                      | 10                                       | 11                    | 38/50                        | -26                                    | <0.0001                             | <0.0001                                    | <0.0001                                    |        |
| N2 <i>col-127</i> (RNAi)                                                                                                                                                                                                                                                               | 20                                        | 8.0 ± 0.4                      | 10                                       | 10                    | 24/24                        | -24                                    | <0.0001                             | <0.0001                                    | <0.0001                                    |        |
| N2 <i>col-133</i> (RNAi)                                                                                                                                                                                                                                                               | 20                                        | 8.1 ± 0.3                      | 10                                       | 10                    | 37/40                        | -23                                    | <0.0001                             | <0.0001                                    | <0.0001                                    |        |
| N2 <i>col-144</i> (RNAi)                                                                                                                                                                                                                                                               | 20                                        | 8.0 ± 0.3                      | 10                                       | 11                    | 32/41                        | -24                                    | <0.0001                             | <0.0001                                    | <0.0001                                    |        |
| N2 <i>col-167</i> (RNAi)                                                                                                                                                                                                                                                               | 20                                        | 8.6 ± 0.3                      | 10                                       | 10                    | 28/29                        | -18                                    | <0.0001                             | <0.0001                                    | <0.0001                                    |        |
| N2 <i>col-176</i> (RNAi)                                                                                                                                                                                                                                                               | 20                                        | 9.5 ± 0.3                      | 11                                       | 12                    | 32/34                        | -10                                    | 0.0108                              | <0.0001                                    | <0.0001                                    |        |
| N2 <i>col-180</i> (RNAi)                                                                                                                                                                                                                                                               | 20                                        | 7.8 ± 0.4                      | 10                                       | 10                    | 25/34                        | -26                                    | <0.0001                             | <0.0001                                    | <0.0001                                    |        |
| Parallel trial using 15.4 mM t-BOOH at 20°C                                                                                                                                                                                                                                            |                                           |                                |                                          |                       |                              |                                        |                                     |                                            |                                            |        |
| N2 L4440(RNAi)                                                                                                                                                                                                                                                                         | 20                                        | 9.5 ± 0.3                      | 11                                       | 14                    | 70/80                        |                                        |                                     |                                            |                                            |        |
| N2 <i>skn-1</i> (RNAi)                                                                                                                                                                                                                                                                 | 20                                        | 6.6 ± 0.2                      | 8                                        | 10                    | 45/50                        | -30                                    | <0.0001                             |                                            |                                            |        |
| N2 <i>daf-2</i> (RNAi)*                                                                                                                                                                                                                                                                | 20                                        | 13.0 ± 0.4                     | 16                                       | -                     | 54/74                        | +37                                    | <0.0001                             | <0.0001                                    |                                            |        |
| N2 <i>col-120</i> (RNAi)                                                                                                                                                                                                                                                               | 20                                        | 7.6 ± 0.2                      | 9                                        | 9                     | 46/58                        | -20                                    | <0.0001                             | 0.0008                                     | <0.0001                                    |        |
| N2 <i>col-127</i> (RNAi)                                                                                                                                                                                                                                                               | 20                                        | 7.9 ± 0.3                      | 9                                        | 10                    | 35/45                        | -17                                    | <0.0001                             | 0.0003                                     | <0.0001                                    |        |
| N2 <i>col-133</i> (RNAi)                                                                                                                                                                                                                                                               | 20                                        | 7.7 ± 0.2                      | 8                                        | 9                     | 34/40                        | -19                                    | <0.0001                             | 0.0035                                     | <0.0001                                    |        |
| N2 <i>col-144</i> (RNAi)                                                                                                                                                                                                                                                               | 20                                        | 7.5 ± 0.3                      | 9                                        | 11                    | 33/43                        | -21                                    | <0.0001                             | 0.0086                                     | <0.0001                                    |        |
| N2 <i>col-167</i> (RNAi)                                                                                                                                                                                                                                                               | 20                                        | 8.3 ± 0.2                      | 9                                        | 9                     | 24/25                        | -13                                    | 0.0007                              | <0.0001                                    | <0.0001                                    |        |
| N2 <i>col-176</i> (RNAi)                                                                                                                                                                                                                                                               | 20                                        | 8.9 ± 0.2                      | 10                                       | 11                    | 41/47                        | -6                                     | 0.0049                              | <0.0001                                    | <0.0001                                    |        |
| N2 <i>col-180</i> (RNAi)                                                                                                                                                                                                                                                               | 20                                        | 7.6 ± 0.3                      | 9                                        | 10                    | 33/41                        | -20                                    | <0.0001                             | 0.0052                                     | <0.0001                                    |        |
| (N) = number of animals observed. Animals that crawled off the plates, buried into the agar, or exploded were censored. * scored survival for 16 hours. At 16 hours, several N2 <i>daf-2</i> (RNAi) animals were alive. P-values for survival curves were determined by Log-Rank test. |                                           |                                |                                          |                       |                              |                                        |                                     |                                            |                                            |        |
| 3 combined trials of 5mM Arsenite treatment for 21 hours                                                                                                                                                                                                                               |                                           |                                |                                          |                       |                              |                                        |                                     |                                            |                                            |        |
| Strain                                                                                                                                                                                                                                                                                 | Mean survival after 21 hours ± S.E.M. [%] | Number of animals              | P-value vs. N2 (L4440)                   | Figure                |                              |                                        |                                     |                                            |                                            |        |
| N2 L4440(RNAi)                                                                                                                                                                                                                                                                         | 52.9 ± 1.8                                | 189                            |                                          | Ext. Fig. 6k          |                              |                                        |                                     |                                            |                                            |        |
| N2 <i>skn-1</i> (RNAi)                                                                                                                                                                                                                                                                 | 6.3 ± 4.5                                 | 108                            | <0.001                                   | Ext. Fig. 6k          |                              |                                        |                                     |                                            |                                            |        |
| N2 <i>daf-2</i> (RNAi)                                                                                                                                                                                                                                                                 | 87.1 ± 0.2                                | 101                            | <0.05                                    |                       |                              |                                        |                                     |                                            |                                            |        |
| N2 <i>col-10</i> (RNAi)                                                                                                                                                                                                                                                                | 32.7 ± 10.7                               | 171                            | <0.01                                    | Ext. Fig. 6k          |                              |                                        |                                     |                                            |                                            |        |
| N2 <i>col-13</i> (RNAi)                                                                                                                                                                                                                                                                | 24.0 ± 2.9                                | 155                            | <0.01                                    | Ext. Fig. 6k          |                              |                                        |                                     |                                            |                                            |        |
| N2 <i>col-97</i> (RNAi)                                                                                                                                                                                                                                                                | 27.3 ± 4.4                                | 86                             | <0.01                                    | Ext. Fig. 6k          |                              |                                        |                                     |                                            |                                            |        |
| N2 <i>col-120</i> (RNAi)                                                                                                                                                                                                                                                               | 14.2 ± 3.0                                | 132                            | <0.001                                   | Ext. Fig. 6k          |                              |                                        |                                     |                                            |                                            |        |
| N2 <i>col-127</i> (RNAi)                                                                                                                                                                                                                                                               | 22.3 ± 9.1                                | 70                             | <0.01                                    | Ext. Fig. 6k          |                              |                                        |                                     |                                            |                                            |        |
| N2 <i>col-133</i> (RNAi)                                                                                                                                                                                                                                                               | 20.1 ± 0.7                                | 65                             | <0.01                                    | Ext. Fig. 6k          |                              |                                        |                                     |                                            |                                            |        |
| N2 <i>col-144</i> (RNAi)                                                                                                                                                                                                                                                               | 31.5 ± 6.9                                | 181                            | <0.05                                    | Ext. Fig. 6k          |                              |                                        |                                     |                                            |                                            |        |
| N2 <i>col-167</i> (RNAi)                                                                                                                                                                                                                                                               | 60.5 ± 0.9                                | 124                            | >0.05                                    | Ext. Fig. 6k          |                              |                                        |                                     |                                            |                                            |        |
| N2 <i>col-176</i> (RNAi)                                                                                                                                                                                                                                                               | 48.0 ± 4.2                                | 96                             | >0.05                                    | Ext. Fig. 6k          |                              |                                        |                                     |                                            |                                            |        |
| N2 <i>col-180</i> (RNAi)                                                                                                                                                                                                                                                               | 25.7 ± 13.2                               | 76                             | <0.05                                    | Ext. Fig. 6k          |                              |                                        |                                     |                                            |                                            |        |
| N2 <i>cut-2</i> (RNAi)                                                                                                                                                                                                                                                                 | 50.5 ± 1.3                                | 96                             | >0.05                                    |                       |                              |                                        |                                     |                                            |                                            |        |
| N2 F56D5.3(RNAi)                                                                                                                                                                                                                                                                       | 30.7 ± 12.1                               | 80                             | <0.01                                    | Ext. Fig. 6k          |                              |                                        |                                     |                                            |                                            |        |
| N2 <i>gst-4</i> (RNAi)                                                                                                                                                                                                                                                                 | 39.3 ± 3.1                                | 126                            | <0.01                                    | Ext. Fig. 6k          |                              |                                        |                                     |                                            |                                            |        |
| N2 <i>nit-1</i> (RNAi)                                                                                                                                                                                                                                                                 | 32.8 ± 3.8                                | 112                            | <0.01                                    | Ext. Fig. 6k          |                              |                                        |                                     |                                            |                                            |        |
| 3 combined trials of 5mM Arsenite treatment for 30 hours                                                                                                                                                                                                                               |                                           |                                |                                          |                       |                              |                                        |                                     |                                            |                                            |        |
| Strain                                                                                                                                                                                                                                                                                 | Mean survival after 30 hours ± S.E.M. [%] | Number of animals              | P-value vs. <i>daf-2</i> (e1370) (L4440) | Figure                |                              |                                        |                                     |                                            |                                            |        |
| <i>daf-2</i> (e1370) L4440(RNAi)                                                                                                                                                                                                                                                       | 53.8 ± 2.7                                | 125                            |                                          | Ext. Fig. 6l          |                              |                                        |                                     |                                            |                                            |        |
| <i>daf-2</i> (e1370) <i>skn-1</i> (RNAi)                                                                                                                                                                                                                                               | 14.8 ± 3.8                                | 149                            | <0.001                                   | Ext. Fig. 6l          |                              |                                        |                                     |                                            |                                            |        |
| <i>daf-2</i> (e1370) <i>col-10</i> (RNAi)                                                                                                                                                                                                                                              | 34.0 ± 7.6                                | 69                             | <0.05                                    | Ext. Fig. 6l          |                              |                                        |                                     |                                            |                                            |        |
| <i>daf-2</i> (e1370) <i>col-13</i> (RNAi)                                                                                                                                                                                                                                              | 32.3 ± 9.2                                | 67                             | <0.05                                    | Ext. Fig. 6l          |                              |                                        |                                     |                                            |                                            |        |
| <i>daf-2</i> (e1370) <i>col-97</i> (RNAi)                                                                                                                                                                                                                                              | 47.0 ± 4.0                                | 63                             | >0.05                                    | Ext. Fig. 6l          |                              |                                        |                                     |                                            |                                            |        |
| <i>daf-2</i> (e1370) <i>col-120</i> (RNAi)                                                                                                                                                                                                                                             | 27.5 ± 3.5                                | 60                             | <0.05                                    | Ext. Fig. 6l          |                              |                                        |                                     |                                            |                                            |        |
| <i>daf-2</i> (e1370) <i>col-127</i> (RNAi)                                                                                                                                                                                                                                             | 52.5 ± 4.5                                | 104                            | >0.05                                    | Ext. Fig. 6l          |                              |                                        |                                     |                                            |                                            |        |
| <i>daf-2</i> (e1370) <i>col-133</i> (RNAi)                                                                                                                                                                                                                                             | 47.5 ± 9.5                                | 116                            | >0.05                                    | Ext. Fig. 6l          |                              |                                        |                                     |                                            |                                            |        |
| <i>daf-2</i> (e1370) <i>col-144</i> (RNAi)                                                                                                                                                                                                                                             | 45.7 ± 4.7                                | 94                             | >0.05                                    | Ext. Fig. 6l          |                              |                                        |                                     |                                            |                                            |        |
| <i>daf-2</i> (e1370) <i>col-167</i> (RNAi)                                                                                                                                                                                                                                             | 28.0 ± 9.0                                | 67                             | <0.05                                    | Ext. Fig. 6l          |                              |                                        |                                     |                                            |                                            |        |
| <i>daf-2</i> (e1370) <i>col-176</i> (RNAi)                                                                                                                                                                                                                                             | 54.5 ± 2.5                                | 92                             | >0.05                                    | Ext. Fig. 6l          |                              |                                        |                                     |                                            |                                            |        |
| <i>daf-2</i> (e1370) <i>col-180</i> (RNAi)                                                                                                                                                                                                                                             | 52.0 ± 1.0                                | 70                             | >0.05                                    | Ext. Fig. 6l          |                              |                                        |                                     |                                            |                                            |        |
| <i>daf-2</i> (e1370) <i>cut-2</i> (RNAi)                                                                                                                                                                                                                                               | 52.7 ± 3.5                                | 62                             | >0.05                                    |                       |                              |                                        |                                     |                                            |                                            |        |
| <i>daf-2</i> (e1370) F56D5.3(RNAi)                                                                                                                                                                                                                                                     | 35.33 ± 4.3                               | 72                             | <0.05                                    | Ext. Fig. 6l          |                              |                                        |                                     |                                            |                                            |        |
| <i>daf-2</i> (e1370) <i>gst-4</i> (RNAi)                                                                                                                                                                                                                                               | 32.7 ± 5.9                                | 81                             | <0.05                                    | Ext. Fig. 6l          |                              |                                        |                                     |                                            |                                            |        |
| <i>daf-2</i> (e1370) <i>nit-1</i> (RNAi)                                                                                                                                                                                                                                               | 31.3 ± 6.9                                | 125                            | <0.05                                    | Ext. Fig. 6l          |                              |                                        |                                     |                                            |                                            |        |

N2= wild type. L4440 = empty vector control. P-values for survival after 21 hours for wild type (N2) or 30 hours for *daf-2*(e1370) mutants were determined by one-way ANOVA post hoc Tukey.



**Supplementary Table 17. Primer sequences used for qRT-PCR**

| Gene                      | Forward primer (FP) 5'...3   | Reverse primer (RP) 5'...3 |
|---------------------------|------------------------------|----------------------------|
| <i>col-10</i>             | GTAACCTCTCTACCGGAGCTG        | ATCTCGGTCCATGCAGAGTCG      |
| <i>col-12/13</i>          | GTAGCCTCGGAGTTTCTGGTG        | GATCCACCGAATCCTCCGAC       |
| <i>col-65</i>             | CGGCTCGTCATGCAACTGTG         | TCCGTCGTGACCGTTGTCTC       |
| <i>col-133</i>            | TCCAGGACAGAAGGGACCATC        | CTCCAGCTTGTCTGGTTGTC       |
| <i>col-141</i>            | GGACAAGCAGGAACCTCCAGG        | CATTGCAGCAGAACGAGCTGG      |
| <i>col-167</i>            | CTCTTGTCCGGAGTTGCCGTC        | GCGGGTAACCTCTCTCCAGATG     |
| <i>col-176</i>            | TACTTGCCCACCAGGACCAC         | GGTTGTGGTGCTGTCTTGTC       |
| <i>daf-16*</i>            | TTCCAAGTGATATTGTTGATAGAAGCTG | TTAATCGGCTTCGACTCCT        |
| <i>dod-17</i>             | CTTCGTTGAGAAGCGCGTTGG        | CGTCTGGCAGAGAAGGTTGAG      |
| <i>dod-24</i>             | CACCGAGCCAGGAGGTTATC         | CTGTTGTCCGTCCTCCGATGTTG    |
| F55G11.2                  | CGGAACCTTTGAACGGAGGGAC       | CGAGAGTGAACACGTCTGGAG      |
| <i>gst-38</i>             | ACCGATGAGGAGTGGGAGAAG        | CTGAGCGAGTGGTTTGCCATC      |
| <i>ins-7*</i>             | AGGTCCAGCAGCAGAACCAGAAG      | GAAGYCGTCGGTGCATTCTT       |
| <i>nas-7</i>              | CGAGCAGCGAAACTATGGCC         | TCTCCGGTCTGTCTGGAAAC       |
| <i>nit-1*</i>             | AATCCTCCGACTATCCCTTG         | AGCGAATCGTTTCTTTTGTG       |
| tubulin ( <i>tba-1</i> )* | ACTGATCTCTGCTGACAAGG         | TTGGCTGGCTCGAAGCAA         |

Primers for qRT-PCR were designed according to the following criteria: melting temperature (T<sub>m</sub>) of each PCR primer between 58-60°C; the T<sub>m</sub> of both primers is within 1°C. Amplicon length is 50 to 150. Primers span exon-exon junctions (intron splice-sites) in the target mRNA to prevent amplification of the target from contaminating gDNA. Primers were blasted against the *C. elegans* genome to ensure unique binding, except that *col-12/13* binds to both genes.

Primers that have been used in previous publications: \*<sup>48</sup> and \*\*<sup>4</sup>.

The sequence of the following primers have been published previously:

<sup>49</sup>: *gst-4*, *skn-1*.

<sup>50</sup>: *cdc-42*, *pmp-3*, Y45F10D.4.

<sup>51</sup>: *col-144*

## Supplementary Discussion

### Dauer diapause of *C. elegans*

*C. elegans* develops into a reproductive hermaphrodite adult by passing through four larval stages (L1-L4)<sup>52</sup>. Unfavorable environmental and nutritional conditions (high temperature, crowding, low food availability) induce development into the dauer diapause, a non-reproducing alternative L3 larval stage that is characterized by prolonged periods of immobility, darkening of the body, a decreased body size, a distinct cuticle structure, and shrinkage of the gonad and other structures<sup>1,52,53</sup>. Dauers are resistant to harsh environmental insults and starvation, and can survive for many weeks<sup>53,54</sup>. When environmental conditions become favorable again, dauers reenter the reproductive life cycle by entering the L4 stage<sup>52</sup>. Dauer larvae are thought not to age, because worms that have entered and exited dauer exhibit a normal adult lifespan, even if they previously had remained as dauers for more than 60 days<sup>54</sup>. Development into dauer is dependent upon the activity of DAF-16, which is inhibited directly by IIS through phosphorylation (Extended Data Fig. 1b)<sup>55,56</sup>.

### Dauer-related *daf-2* Class 2 traits

*daf-2* mutations can be categorized as Class 1 or 2<sup>1</sup>. Both mutant classes are predisposed to enter dauer at elevated temperature (e.g. 25°C, Extended Data Fig. 1c, 1i, 1j), but Class 1 mutants appear normal as adults<sup>1</sup>. By contrast, Class 2 mutants are defined by the prevalence of particular traits (decreased movement, pharyngeal pumping, and body size, darkening of the body, gonad shrinkage, reproductive delay, and reduced progeny numbers) in adults at higher temperatures (22.5°C or 25°C)<sup>1</sup>. These Class 2 traits are considered to be dauer-related because of their similarity to the dauer state, and their dependence upon *daf-16*<sup>1</sup>. A striking aspect of

Class 2 traits is their reversibility<sup>1</sup>. For example, when *daf-2(e1370)* adults were downshifted from 25°C to 15°C, mobility and normal morphology were fully restored<sup>1</sup>. Placement of the same animals at 25°C rendered them immobile and morphologically abnormal again within a few days, but this could be reversed by a second downshift to 15°C<sup>1</sup>. These phenotypic shifts could be repeated multiple times in the same adult<sup>1</sup>. Importantly, typical Class 2 mutants such *daf-2(e1370)* exhibit a milder version of Class 2 traits at the temperature most frequently used for lifespan and phenotypic analyses (20°C). At 20°C fewer than 1% of *daf-2(e1370)* animals form dauers and adults initially appear normal, but 100% have a prolonged reproductive period and eventually become immobile as adults<sup>1</sup> (not shown; Supplementary Table 1, Video S1 and S2). For simplicity, in the main text we refer to these Class 2 traits as “dauer-related traits” or “dauer traits”.

### **Temperature regulation of dauer entry and adulthood dauer-related traits**

Many *daf-2* alleles are frequently referred to as temperature-sensitive (ts) because they induce dauer entry and dauer-like (Class 2) traits in a temperature-dependent manner (see above), and because many of these mutations were identified in screens for temperature-dependent dauer formation<sup>1,52,53</sup>. It is therefore both striking and paradoxical that in the same *daf-2* mutants, other major phenotypes are not dependent upon elevated temperature. Class 2 *daf-2* mutations typically extend adult lifespan comparably at either 15°C, 20°C, or 22.5°C (Fig. 1a, Extended Data Table 1, Supplementary Table 2)<sup>1,57-67</sup>, temperatures at which dauer-like Class 2 traits are either absent (15°C), very mild (20°C), or severe (22.5°C)<sup>1</sup>. Moreover, we have shown that in *daf-2* mutants the levels of nuclear DAF-16 and SKN-1, a direct readout of IIS inhibition, are similar at 15°C and 20°C (Extended Data Fig. 1k-o). If these *daf-2* mutations are “ts” in the

typical sense of temperature-dependent protein folding, how can the dauer-related phenotypes be strictly dependent upon temperature while other rIIS effects are temperature-independent?

The simplest answer to this question lies in the profound effect of temperature on dauer regulation. Work performed 30 years ago indicated that many if not most mutants with temperature-sensitive effects on dauer are unlikely to be *ts* with respect to protein folding and gene function, and instead that temperature is a major evolutionarily conserved regulator of dauer entry that operates independently of other variables, so that dauer is essentially a *ts phenotype*<sup>68,69</sup>. This model explains why (1) dauer pheromone-treated wild-type animals and many null mutants readily develop into dauers at higher temperatures, and (2) wild-type animals that are provided with food and have not been exposed to pheromone nevertheless enter dauer at a detectable frequency at 27°C<sup>69,70</sup>. In each case, these animals are “*ts*” with respect to the dauer phenotype. This model, together with our evidence that IIS regulates an underlying longevity pathway that is dauer-independent, also explains why a Class 2 allele like *daf-2(e1370)* can be temperature-dependent with respect to the phenotypes of dauer entry, dauer traits and *skn-1*-independent lifespan extension, but not with respect to longevity *per se*, or nuclear accumulation of DAF-16 and SKN-1 (see text).

In general, genetic, expression, proteomic, and metabolomic studies of rIIS have involved conditions under which dauer-related traits appear in aging adults, such as analysis of Class 2 *daf-2* mutants at 20°C or higher<sup>3,25,27,71-78</sup>. Given that *daf-2* lifespan extension is *skn-1*-independent in such scenarios (see text), it will be important to determine the extent to which

different findings are obtained when such analyses are performed under dauer-independent conditions.

### **3. Supplementary Videos**

For the supplementary videos, *daf-2(e1370)* (Class 2) mutants were grown and maintained at 15°C. At the first day of adulthood, animals were placed on plates containing FUDR and OP50 bacteria, and either kept at 15°C or upshifted to 20°C. At day 14 of adulthood 10 min videos were taken. The videos are shown at 8x speed.

## Supplementary References

- 1 Gems, D. *et al.* Two pleiotropic classes of *daf-2* mutation affect larval arrest, adult behavior, reproduction and longevity in *Caenorhabditis elegans*. *Genetics* **150**, 129-155 (1998).
- 2 Simmer, F. *et al.* Loss of the putative RNA-directed RNA polymerase RRF-3 makes *C. elegans* hypersensitive to RNAi. *Curr Biol* **12**, 1317-1319, doi:S0960982202010412 [pii] (2002).
- 3 Murphy, C. T. *et al.* Genes that act downstream of DAF-16 to influence the lifespan of *Caenorhabditis elegans*. *Nature* **424**, 277-283, doi:10.1038/nature01789 nature01789 [pii] (2003).
- 4 Oliveira, R. P. *et al.* Condition-adapted stress and longevity gene regulation by *Caenorhabditis elegans* SKN-1/Nrf. *Aging Cell* **8**, 524-541, doi:ACE501 [pii] 10.1111/j.1474-9726.2009.00501.x (2009).
- 5 Kim, Y. & Sun, H. Functional genomic approach to identify novel genes involved in the regulation of oxidative stress resistance and animal lifespan. *Aging Cell* **6**, 489-503, doi:ACE302 [pii] 10.1111/j.1474-9726.2007.00302.x (2007).
- 6 Curran, S. P. & Ruvkun, G. Lifespan regulation by evolutionarily conserved genes essential for viability. *PLoS Genet* **3**, e56, doi:07-PLGE-RA-0112R1 [pii] 10.1371/journal.pgen.0030056 (2007).
- 7 Hamilton, B. *et al.* A systematic RNAi screen for longevity genes in *C. elegans*. *Genes Dev* **19**, 1544-1555, doi:19/13/1544 [pii] 10.1101/gad.1308205 (2005).
- 8 Tacutu, R. *et al.* Prediction of *C. elegans* Longevity Genes by Human and Worm Longevity Networks. *PLoS One* **7**, e48282, doi:10.1371/journal.pone.0048282 PONE-D-12-16927 [pii] (2012).
- 9 Samuelson, A. V., Klimczak, R. R., Thompson, D. B., Carr, C. E. & Ruvkun, G. Identification of *Caenorhabditis elegans* genes regulating longevity using enhanced RNAi-sensitive strains. *Cold Spring Harb Symp Quant Biol* **72**, 489-497, doi:10.1101/sqb.2007.72.068 10.1101/sqb.2007.72.068 [pii] (2007).
- 10 Tullet, J. M. *et al.* Direct inhibition of the longevity-promoting factor SKN-1 by insulin-like signaling in *C. elegans*. *Cell* **132**, 1025-1038, doi:S0092-8674(08)00130-X [pii] 10.1016/j.cell.2008.01.030 (2008).
- 11 Chi, W. & Reinke, V. Promotion of oogenesis and embryogenesis in the *C. elegans* gonad by EFL-1/DPL-1 (E2F) does not require LIN-35 (pRB). *Development* **133**, 3147-3157, doi:dev.02490 [pii] 10.1242/dev.02490 (2006).
- 12 Hunt-Newbury, R. *et al.* High-throughput in vivo analysis of gene expression in *Caenorhabditis elegans*. *PLoS Biol* **5**, e237, doi:07-PLBI-RA-0103 [pii] 10.1371/journal.pbio.0050237 (2007).
- 13 Blackwell, T. K., Bowerman, B., Priess, J. R. & Weintraub, H. Formation of a monomeric DNA binding domain by Skn-1 bZIP and homeodomain elements. *Science* **266**, 621-628 (1994).

- 14 Niu, W. *et al.* Diverse transcription factor binding features revealed by genome-wide ChIP-seq in *C. elegans*. *Genome Res* **21**, 245-254, doi:gr.114587.110 [pii] 10.1101/gr.114587.110 (2011).
- 15 Roy, P. J., Stuart, J. M., Lund, J. & Kim, S. K. Chromosomal clustering of muscle-expressed genes in *Caenorhabditis elegans*. *Nature* **418**, 975-979, doi:10.1038/nature01012 (2002).
- 16 Fox, R. M. *et al.* The embryonic muscle transcriptome of *Caenorhabditis elegans*. *Genome Biol* **8**, R188, doi:gb-2007-8-9-r188 [pii] 10.1186/gb-2007-8-9-r188 (2007).
- 17 Budovskaya, Y. V. *et al.* An elt-3/elt-5/elt-6 GATA transcription circuit guides aging in *C. elegans*. *Cell* **134**, 291-303, doi:S0092-8674(08)00707-1 [pii] 10.1016/j.cell.2008.05.044 (2008).
- 18 Viswanathan, M., Kim, S. K., Berdichevsky, A. & Guarente, L. A role for SIR-2.1 regulation of ER stress response genes in determining *C. elegans* life span. *Dev Cell* **9**, 605-615, doi:S1534-5807(05)00379-5 [pii] 10.1016/j.devcel.2005.09.017 (2005).
- 19 Menzel, R. *et al.* The Nematode *Caenorhabditis elegans*, Stress and Aging: Identifying the Complex Interplay of Genetic Pathways Following the Treatment with Humic Substances. *Front Genet* **3**, 50, doi:10.3389/fgene.2012.00050 (2012).
- 20 Pietsch, K. *et al.* Meta-Analysis of Global Transcriptomics Suggests that Conserved Genetic Pathways are Responsible for Quercetin and Tannic Acid Mediated Longevity in *C. elegans*. *Front Genet* **3**, 48, doi:10.3389/fgene.2012.00048 (2012).
- 21 Schmeisser, S. *et al.* Neuronal ROS signaling rather than AMPK/sirtuin-mediated energy sensing links dietary restriction to lifespan extension. *Molecular Metabolism* **2**, 1-11 (2013).
- 22 Gusarov, I. *et al.* Bacterial nitric oxide extends the lifespan of *C. elegans*. *Cell* **152**, 818-830, doi:S0092-8674(13)00014-7 [pii] 10.1016/j.cell.2012.12.043 (2013).
- 23 Staab, T. A. *et al.* The Conserved SKN-1/Nrf2 Stress Response Pathway Regulates Synaptic Function in *Caenorhabditis elegans*. *PLoS Genet* **9**, e1003354, doi:10.1371/journal.pgen.1003354 PGENETICS-D-12-02463 [pii] (2013).
- 24 Iser, W. B., Wilson, M. A., Wood, W. H., 3rd, Becker, K. & Wolkow, C. A. Co-regulation of the DAF-16 target gene, *cyp-35B1/dod-13*, by HSF-1 in *C. elegans* dauer larvae and *daf-2* insulin pathway mutants. *PLoS One* **6**, e17369, doi:10.1371/journal.pone.0017369 (2011).
- 25 Halaschek-Wiener, J. *et al.* Analysis of long-lived *C. elegans daf-2* mutants using serial analysis of gene expression. *Genome Res* **15**, 603-615, doi:gr.3274805 [pii] 10.1101/gr.3274805 (2005).
- 26 Zarse, K. *et al.* Impaired insulin/IGF1 signaling extends life span by promoting mitochondrial L-proline catabolism to induce a transient ROS signal. *Cell Metab* **15**, 451-465, doi:S1550-4131(12)00094-0 [pii] 10.1016/j.cmet.2012.02.013 (2012).
- 27 Shaw, W. M., Luo, S., Landis, J., Ashraf, J. & Murphy, C. T. The *C. elegans* TGF-beta Dauer pathway regulates longevity via insulin signaling. *Curr Biol* **17**, 1635-1645, doi:S0960-9822(07)01914-8 [pii]



- 10.1016/j.cub.2007.08.058 (2007).
- 28 Mair, W. *et al.* Lifespan extension induced by AMPK and calcineurin is mediated by CRTC-1 and CREB. *Nature* **470**, 404-408, doi:nature09706 [pii] 10.1038/nature09706 (2011).
- 29 Greer, E. L. *et al.* Members of the H3K4 trimethylation complex regulate lifespan in a germline-dependent manner in *C. elegans*. *Nature* **466**, 383-387, doi:nature09195 [pii] 10.1038/nature09195 (2010).
- 30 Cristina, D., Cary, M., Lunceford, A., Clarke, C. & Kenyon, C. A regulated response to impaired respiration slows behavioral rates and increases lifespan in *Caenorhabditis elegans*. *PLoS Genet* **5**, e1000450, doi:10.1371/journal.pgen.1000450 (2009).
- 31 Chen, D. *et al.* Germline signaling mediates the synergistically prolonged longevity produced by double mutations in *daf-2* and *rsk-1* in *C. elegans*. *Cell reports* **5**, 1600-1610, doi:10.1016/j.celrep.2013.11.018 (2013).
- 32 Chen, S. *et al.* The conserved NAD(H)-dependent corepressor CTBP-1 regulates *Caenorhabditis elegans* life span. *Proc Natl Acad Sci U S A* **106**, 1496-1501, doi:0802674106 [pii] 10.1073/pnas.0802674106 (2009).
- 33 Huang da, W., Sherman, B. T. & Lempicki, R. A. Bioinformatics enrichment tools: paths toward the comprehensive functional analysis of large gene lists. *Nucleic Acids Res* **37**, 1-13, doi:gkn923 [pii] 10.1093/nar/gkn923 (2009).
- 34 Huang, D. W., Sherman, B. T. & Lempicki, R. A. Systematic and integrative analysis of large gene lists using DAVID Bioinformatics Resources. *Nature Protoc.* **4**, 44-57 (2009).
- 35 Dennis, G., Jr. *et al.* DAVID: Database for Annotation, Visualization, and Integrated Discovery. *Genome Biol* **4**, P3 (2003).
- 36 Golden, T. R., Hubbard, A., Dando, C., Herren, M. A. & Melov, S. Age-related behaviors have distinct transcriptional profiles in *Caenorhabditis elegans*. *Aging Cell* **7**, 850-865, doi:ACE433 [pii] 10.1111/j.1474-9726.2008.00433.x (2008).
- 37 Selman, C. *et al.* Ribosomal protein S6 kinase 1 signaling regulates mammalian life span. *Science* **326**, 140-144, doi:10.1126/science.1177221 (2009).
- 38 Neff, F. *et al.* Rapamycin extends murine lifespan but has limited effects on aging. *J Clin Invest* **123**, 3272-3291, doi:10.1172/JCI67674 (2013).
- 39 Tsuchiya, T. *et al.* Additive regulation of hepatic gene expression by dwarfism and caloric restriction. *Physiological genomics* **17**, 307-315, doi:10.1152/physiolgenomics.00039.2004 (2004).
- 40 Dhahbi, J. M., Mote, P. L., Fahy, G. M. & Spindler, S. R. Identification of potential caloric restriction mimetics by microarray profiling. *Physiological genomics* **23**, 343-350, doi:10.1152/physiolgenomics.00069.2005 (2005).
- 41 Boylston, W. H., DeFord, J. H. & Papaconstantinou, J. Identification of longevity-associated genes in long-lived Snell and Ames dwarf mice. *Age (Dordr)* **28**, 125-144, doi:10.1007/s11357-006-9008-6 (2006).
- 42 Zhang, Y. *et al.* The starvation hormone, fibroblast growth factor-21, extends lifespan in mice. *eLife* **1**, e00065, doi:10.7554/eLife.00065 (2012).

- 43 Sun, L. Y. *et al.* Growth hormone-releasing hormone disruption extends lifespan and regulates response to caloric restriction in mice. *eLife* **2**, e01098, doi:10.7554/eLife.01098 (2013).
- 44 Osburn, W. O. *et al.* Genetic or pharmacologic amplification of nrf2 signaling inhibits acute inflammatory liver injury in mice. *Toxicol Sci* **104**, 218-227, doi:10.1093/toxsci/kfn079 (2008).
- 45 Joo, M. S., Lee, C. G., Koo, J. H. & Kim, S. G. miR-125b transcriptionally increased by Nrf2 inhibits AhR repressor, which protects kidney from cisplatin-induced injury. *Cell death & disease* **4**, e899, doi:10.1038/cddis.2013.427 (2013).
- 46 Brenner, S. The genetics of *Caenorhabditis elegans*. *Genetics* **77**, 71-94 (1974).
- 47 Hedgecock, E. M. & Herman, R. K. The *ncl-1* gene and genetic mosaics of *Caenorhabditis elegans*. *Genetics* **141**, 989-1006 (1995).
- 48 Robida-Stubbs, S. *et al.* TOR Signaling and Rapamycin Influence Longevity by Regulating SKN-1/Nrf and DAF-16/FoxO. *Cell Metab* **15**, 713-724, doi:S1550-4131(12)00147-7 [pii] 10.1016/j.cmet.2012.04.007 (2012).
- 49 Li, X. *et al.* Specific SKN-1/Nrf Stress Responses to Perturbations in Translation Elongation and Proteasome Activity. *PLoS Genet* **7**, e1002119, doi:10.1371/journal.pgen.1002119 PGENETICS-D-11-00172 [pii] (2011).
- 50 Hoogewijs, D., Houthoofd, K., Matthijssens, F., Vandesompele, J. & Vanfleteren, J. R. Selection and validation of a set of reliable reference genes for quantitative sod gene expression analysis in *C. elegans*. *BMC Mol Biol* **9**, 9, doi:1471-2199-9-9 [pii] 10.1186/1471-2199-9-9 (2008).
- 51 Liby, P. *et al.* BIR-1, the homologue of human Survivin, regulates expression of developmentally active collagen genes in *C. elegans*. *Folia Biol (Praha)* **52**, 101-108, doi:FB2006A0013 [pii] (2006).
- 52 Riddle, D. L., Blumenthal, T., Meyer, B. J. & Priess, J. R. in *C. elegans II* (eds D. L. Riddle, T. Blumenthal, B. J. Meyer, & J. R. Priess) (1997).
- 53 Riddle, D. L., Swanson, M. M. & Albert, P. S. Interacting genes in nematode dauer larva formation. *Nature* **290**, 668-671 (1981).
- 54 Klass, M. & Hirsh, D. Non-ageing developmental variant of *Caenorhabditis elegans*. *Nature* **260**, 523-525 (1976).
- 55 Kenyon, C. J. The genetics of ageing. *Nature* **464**, 504-512, doi:nature08980 [pii] 10.1038/nature08980 (2010).
- 56 Shore, D. E. & Ruvkun, G. A cytoprotective perspective on longevity regulation. *Trends in cell biology* **23**, 409-420, doi:10.1016/j.tcb.2013.04.007 (2013).
- 57 Dorman, J. B., Albinder, B., Shroyer, T. & Kenyon, C. The *age-1* and *daf-2* genes function in a common pathway to control the lifespan of *Caenorhabditis elegans*. *Genetics* **141**, 1399-1406 (1995).
- 58 Qi, W., Huang, X., Neumann-Haefelin, E., Schulze, E. & Baumeister, R. Cell-nonautonomous signaling of FOXO/DAF-16 to the stem cells of *Caenorhabditis elegans*. *PLoS Genet* **8**, e1002836, doi:10.1371/journal.pgen.1002836 PGENETICS-D-12-00777 [pii] (2012).
- 59 Narasimhan, S. D. *et al.* PDP-1 links the TGF-beta and IIS pathways to regulate longevity, development, and metabolism. *PLoS Genet* **7**, e1001377, doi:10.1371/journal.pgen.1001377 (2011).

- 60 Padmanabhan, S. *et al.* A PP2A regulatory subunit regulates *C. elegans* insulin/IGF-1 signaling by modulating AKT-1 phosphorylation. *Cell* **136**, 939-951, doi:S0092-8674(09)00073-7 [pii] 10.1016/j.cell.2009.01.025 (2009).
- 61 Boehm, M. & Slack, F. A developmental timing microRNA and its target regulate life span in *C. elegans*. *Science* **310**, 1954-1957, doi:310/5756/1954 [pii] 10.1126/science.1115596 (2005).
- 62 Melendez, A. *et al.* Autophagy genes are essential for dauer development and life-span extension in *C. elegans*. *Science* **301**, 1387-1391, doi:10.1126/science.1087782 301/5638/1387 [pii] (2003).
- 63 McCulloch, D. & Gems, D. Body size, insulin/IGF signaling and aging in the nematode *Caenorhabditis elegans*. *Exp Gerontol* **38**, 129-136, doi:S053155650200147X [pii] (2003).
- 64 Gerisch, B., Weitzel, C., Kober-Eisermann, C., Rottiers, V. & Antebi, A. A hormonal signaling pathway influencing *C. elegans* metabolism, reproductive development, and life span. *Dev Cell* **1**, 841-851, doi:S1534-5807(01)00085-5 [pii] (2001).
- 65 Larsen, P. L., Albert, P. S. & Riddle, D. L. Genes that regulate both development and longevity in *Caenorhabditis elegans*. *Genetics* **139**, 1567-1583 (1995).
- 66 Tissenbaum, H. A. & Ruvkun, G. An insulin-like signaling pathway affects both longevity and reproduction in *Caenorhabditis elegans*. *Genetics* **148**, 703-717 (1998).
- 67 Hars, E. S. *et al.* Autophagy regulates ageing in *C. elegans*. *Autophagy* **3**, 93-95, doi:3636 [pii] (2007).
- 68 Golden, J. W. & Riddle, D. L. The *Caenorhabditis elegans* dauer larva: developmental effects of pheromone, food, and temperature. *Dev Biol* **102**, 368-378, doi:0012-1606(84)90201-X [pii] (1984).
- 69 Golden, J. W. & Riddle, D. L. A pheromone-induced developmental switch in *Caenorhabditis elegans*: Temperature-sensitive mutants reveal a wild-type temperature-dependent process. *Proc Natl Acad Sci U S A* **81**, 819-823 (1984).
- 70 Ailion, M. & Thomas, J. H. Dauer formation induced by high temperatures in *Caenorhabditis elegans*. *Genetics* **156**, 1047-1067 (2000).
- 71 McElwee, J., Bubb, K. & Thomas, J. H. Transcriptional outputs of the *Caenorhabditis elegans* forkhead protein DAF-16. *Aging Cell* **2**, 111-121 (2003).
- 72 Lee, S. S., Kennedy, S., Tolonen, A. C. & Ruvkun, G. DAF-16 target genes that control *C. elegans* life-span and metabolism. *Science* **300**, 644-647, doi:10.1126/science.1083614 (2003).
- 73 Dong, M. Q. *et al.* Quantitative mass spectrometry identifies insulin signaling targets in *C. elegans*. *Science* **317**, 660-663, doi:10.1126/science.1139952 (2007).
- 74 Stout, G. J. *et al.* Insulin/IGF-1-mediated longevity is marked by reduced protein metabolism. *Mol Syst Biol* **9**, 679, doi:10.1038/msb.2013.35 (2013).
- 75 Samuelson, A. V., Carr, C. E. & Ruvkun, G. Gene activities that mediate increased life span of *C. elegans* insulin-like signaling mutants. *Genes Dev* **21**, 2976-2994, doi:21/22/2976 [pii] 10.1101/gad.1588907 (2007).
- 76 Curran, S. P., Wu, X., Riedel, C. G. & Ruvkun, G. A soma-to-germline transformation in long-lived *Caenorhabditis elegans* mutants. *Nature* **459**, 1079-1084, doi:nature08106 [pii]

- 10.1038/nature08106 (2009).
- 77 Castro, C. *et al.* A study of *Caenorhabditis elegans* DAF-2 mutants by metabolomics and differential correlation networks. *Molecular bioSystems* **9**, 1632-1642, doi:10.1039/c3mb25539e (2013).
- 78 Depuydt, G. *et al.* LC-MS proteomics analysis of the insulin/IGF-1-deficient *Caenorhabditis elegans daf-2(e1370)* mutant reveals extensive restructuring of intermediary metabolism. *Journal of proteome research* **13**, 1938-1956, doi:10.1021/pr401081b (2014).
